# Supplementary material for: Pseudomonas aeruginosa clinical and environmental isolates constitute a single population with high phenotypic diversity
Source: PubMed Central journal article supplement (PMC4234422; doi:10.1186/1471-2164-15-318), 2014-04-28
Supplement: 1471-2164-15-318-S3.pdf [file 1471-2164-15-318-S3.pdf]

flia

PAO1 MTAASGVRMYSKAQAQNSQEQLIQRYAPLVKRIAYHLLGRLPASVQVEDLMQAGMIGLLE 60
148 -----MYSKAQAQNSQEQLIQRYAPLVKRIAYHLLGRLPASVQVEDLMQAGMIGLLE 52
ID4365 -----MYSKAQAQNSQEQLIQRYAPLVKRIAYHLLGRLPASVQVEDLMQAGMIGLLE 52
IGB83 -----MYSKAQAQNSQEQLIQRYAPLVKRIAYHLLGRLPASVQVEDLMQAGMIGLLE 52
M10 -----MYSKAQAQNSQEQLIQRYAPLVKRIAYHLLGRLPASVQVEDLMQAGMIGLLE 52
\*\*\*\*\*

PAO1 AAKKYDAGKGFETYAGIRIRGAMLEVRKGDWAPRSVHRNTRMVTDAIRAIEARTGRD 120
148 AAKKYDAGKGFETYAGIRIRGAMLEVRKGDWAPRSVHRNTRMVTDAIRAIEARTGRD 112
ID4365 AAKKYDAGKGFETYAGIRIRGAMLEVRKGDWAPRSVHRNTRMVTDAIRAIEARTGRD 112
IGB83 AAKKYDAGKGFETYAGIRIRGAMLEVRKGDWAPRSVHRNTRMVTDAIRAIEARTGRD 112
M10 AAKKYDAGKGFETYAGIRIRGAMLEVRKGDWAPRSVHRNTRMVTDAIRAIEARTGRD 112
\*\*\*\*\*

PAO1 AKDHEVAEELQSLLEDYYGILSDTQGSRLYSFDDLLQDGEHGLPEDTSLSHNEPIHGLLD 180
148 AKDHEVAEELQSLLEDYYGILSDTQGSRLYSFDDLLQDGEHGLPEDTSLSHNEPIHGLLD 172
ID4365 AKDHEVAEELQSLLEDYYGILSDTQGSRLYSFDDLLQDGEHGLPEDTSLSHNEPIHGLLD 172
IGB83 AKDHEVAEELQSLLEDYYGILSDTQGSRLYSFDDLLQDGEHGLPEDTSLSHNEPIHGLLD 172
M10 AKDHEVAEELQSLLEDYYGILSDTQGSRLYSFDDLLQDGEHGLPEDTSLSHNEPIHGLLD 172
\*\*\*\*\*

PAO1 ERFQALADAI AKLPERERLVLALYDEELNLKEIGEVLVSESRVSQLHSQCAARLRAR 240
148 ERFQALADAI AKLPERERLVLALYDEELNLKEIGEVLVSESRVSQLHSQCAARLRAR 232
ID4365 ERFQALADAI AKLPERERLVLALYDEELNLKEIGEVLVSESRVSQLHSQCAARLRAR 232
IGB83 ERFQALADAI AKLPERERLVLALYDEELNLKEIGEVLVSESRVSQLHSQCAARLRAR 232
M10 ERFQALADAI AKLPERERLVLALYDEELNLKEIGEVLVSESRVSQLHSQCAARLRAR 232
\*\*\*\*\*

PAO1 LADWRS A 247
148 LADWRS A 239
ID4365 LADWRS A 239
IGB83 LADWRS A 239
M10 LADWRS G 239
\*\*\*\*\*

fliaC

PAO1 -----MALTVNTNIAASLNTQRNLNASSNDLNTSLQRLTTG 35
M10 -----MALTVNTNIAASLNTQRNLNASSNDLNTSLQRLTTG 35
IGB83 MGHLKQKAEERSQAQVTEIGPLEEITMALT VNTNIAASLNTQRNLNASSNDLNTSLQRLTTG 60
ID4365 MGHLKQKAEERSQAQVTEIGPLEEITMALT VNTNIAASLNTQRNLNASSNDLNTSLQRLTTG 60
148 -----MALTVNTNIAASLNTQRNLNASSNDLNTSLQRLSTG 35
\*\*\*\*\*

PAO1 YRINSAKDDAAGLQISNRLSNQISGLNVATRNANDGISLAQTAEGALQOSTNIIQRIRDL 95
M10 YRINSAKDDAAGLQISNRLSNQISGLNVATRNANDGISLAQTAEGALQOSTNIIQRIRDL 95
IGB83 YRINSAKDDAAGLQISNRLSNQISGLNVATRNANDGISLAQTAEGALQOSTNIIQRIRDL 120
ID4365 YRINSAKDDAAGLQISNRLSNQISGLNVATRNANDGISLAQTAEGALQOSTNIIQRIRDL 120
148 SRINSAKDDAAGLQIANRLTSQVGNLVATKNANDGISLAQTAEGALQOSTNIIQRMRDL 95
\*\*\*\*\*

PAO1 ALQSAANGSNSDADRAALQKEVAQAQELTRISDTTTFGGRKLLDGSFGTTSFQVGSNAYE 155
M10 ALQSAANGSNSDADRAALQKEVAQAQELTRISDTTTFGGRKLLDGSFGTTSFQVGSNAYE 155
IGB83 ALQSAANGSNSDADRAALQKEVAQAQELTRISDTTTFGGRKLLDGSFGTTSFQVGSNAYE 180
ID4365 ALQSAANGSNSDADRAALQKEVAQAQELTRISDTTTFGGRKLLDGSFGTTSFQVGSNAYE 180
148 SLQSAANGSNSDSERTALNGEVKQLQKELDRISNTTTFGGRKLLDGSFGVASFQVGSAAANE 155
\*\*\*\*\*

PAO1 TIDISLQNASASAI GSYQVGSNGAGTVASVAGTATASGIASGT VNLVGGGQVKN-IAIAA 214
M10 TIDISLQNASASAI GSYQVGSNGAGTVASVAGTATASGIASGT VNLVGGGQVKN-IAIAA 214
IGB83 TIDISLQNASASAI GSYQVGSNGAGTVASVAGTATASGIASGT VNLVGGGQVKN-IAIAA 239
ID4365 TIDISLQNASASAI GSYQVGSNGAGTVASVAGTATASGIASGT VNLVGGGQVKN-IAIAA 239
148 IISVGI DEMSAESLNGTYFTATGGGAVA----AATASGTVDIAIGITGGS AVNVKVD MKG 211
\*\*\*\*\*

PAO1 GDSAKAIAEKMDGAI PNLSARARTVFTADVSGVTGGSLNFDVTVGSNTVSLAGVTSTQDL 274
M10 GDSAKAIAEKMDGAI PNLSARARTVFTADVSGVTGGSLNFDVTVGSNTVSLAGVTSTQDL 274
IGB83 GDSAKAIAEKMDGAI PNLSARARTVFTADVSGVTGGSLNFDVTVGSNTVSLAGVTSTQDL 299
ID4365 GDSAKAIAEKMDGAI PNLSARARTVFTADVSGVTGGSLNFDVTVGSNTVSLAGVTSTQDL 299
148 NETAEQA AAKIAAAV-----
\*\*\*\*\*

PAO1 ADQLNSNSSKLGITAS INDKGVLTI TSATGENVKFGAQTGTATAGQVAVKVQGS DKGFEA 334
M10 ADQLNSNSSKLGITAS INDKGVLTI TSATGENVKFGAQTGTATAGQVAVKVQGS DKGFEA 334
IGB83 ADQLNSNSSKLGITAS INDKGVLTI TSATGENVKFGAQTGTATAGQVAVKVQGS DKGFEA 359
ID4365 ADQLNSNSSKLGITAS INDKGVLTI TSATGENVKFGAQTGTATAGQVAVKVQGS DKGFEA 359
148 -----NDANVGI GAF TDGAQI SYVSKAS-----ADGTTSAVSGVAITDTGSTG---- 269
\*\*\*\*\*

PAO1 AAKNVVAAGTAATTTIVTGYVQLNSPTAYSVSGTGTQASQVFGNASAAQKSSVASVDIST 394



\*:

fliE

PA01 MSQGVFNRRLMELMRSMQMEAMAKAKPVQAPAEVGFAPSFSEMLSQAVDKVNETQQASTAM 60  
 148 MSQGVFNRRLMELMRSMQMEAMAKAKPVQAPAEVGFAPSFSEMLSQAVDKVNETQQASTAM 60  
 ID4365 MSQGVFNRRLMELMRSMQMEAMAKAKPVQAPAEVGFAPSFSEMLSQAVDKVNETQQASTAM 60  
 M10 MSQGVFNRRLMELMRSMQMEAMAKAKPVQAPAEVGFAPSFSEMLSQAVDKVNETQQASTAM 60  
 IGB83 MSQGVFNRRLMELMRSMQMEAMAKAKPVQAPAEVGFAPSFSEMLSQAVDKVNETQQASTAM 60  
 \*\*\*\*\*

PA01 ANAFEVGQSGVDLTDVMIASQKASVSFQAMTQVRNKLQAYQDIMQMPV 109  
 148 ANAFEVGQSGVDLTDVMIASQKASVSFQAMTQVRNKLQAYQDIMQMPV 109  
 ID4365 ANAFEVGQSGVDLTDVMIASQKASVSFQAMTQVRNKLQAYQDIMQMPV 109  
 M10 ANAFEVGQSGVDLTDVMIASQKASVSFQAMTQVRNKLQAYQDIMQMPV 109  
 IGB83 ANAFEVGQSGVDLTDVMIASQKASVSFQAMTQVRNKLQAYQDIMQMPV 109  
 \*\*\*\*\*

fliF

PA01 MADALIDSQVPAKSGGAGMLKKSFPGLSFLDNLSEMTMLRQIGLLVGLAASVAIGFAVVL 60  
 148 MADALIDSQVPAKSGGAGMLKKSFPGLSFLDNLSEMTMLRQIGLLVGLAASVAIGFAVVL 60  
 ID4365 MADALIDSQVPAKSGGAGMLKKSFPGLSFLDNLSEMTMLRQIGLLVGLAASVAIGFAVVL 60  
 M10 MADALIDSQVPAKSGGAGMLKKSFPGLSFLDNLSEMTMLRQIGLLVGLAASVAIGFAVVL 60  
 IGB83 MADALIDSQVPAKSGGAGMLKKSFPGLSFLDNLSEMTMLRQIGLLVGLAASVAIGFAVVL 60  
 \*\*\*\*\*

PA01 WSQQPDYKPLYGSLNGVDANRVVEALTAADIPYKVEPNSGALLVKADDLGRARMKVASAG 120  
 148 WSQQPDYKPLYGSLNGVDANRVVEALTAADIPYKVEPNSGALLVKADDLGRARMKVASAG 120  
 ID4365 WSQQPDYKPLYGSLNGVDANRVVEALTAADIPYKVEPNSGALLVKADDLGRARMKVASAG 120  
 M10 WSQQPDYKPLYGSLNGVDANRVVEALTAADIPYKVEPNSGALLVKADDLGRARMKVASAG 120  
 IGB83 WSQQPDYKPLYGSLNGVDANRVVEALTAADIPYKVEPNSGALLVKADDLGRARMKVASAG 120  
 \*\*\*\*\*

PA01 VAPTNNVGFELDKQALGTSQFMEATNYRRGLEGELARTVSSLNNVKAARVHLAIPKS 180  
 148 VAPTNNVGFELDKQALGTSQFMEATNYRRGLEGELARTVSSLNNVKAARVHLAIPKS 180  
 ID4365 VAPTNNVGFELDKQALGTSQFMEATNYRRGLEGELARTVSSLNNVKAARVHLAIPKS 180  
 M10 VAPTNNVGFELDKQALGTSQFMEATNYRRGLEGELARTVSSLNNVKAARVHLAIPKS 180  
 IGB83 VAPTNNVGFELDKQALGTSQFMEATNYRRGLEGELARTVSSLNNVKAARVHLAIPKS 180  
 \*\*\*\*\*

PA01 SVFVRDRKPSASVLELYPGRSLEPSQVMAIVNLVATSVPELDSQVTVVDQKGNLLSD 240  
 148 SVFVRDRKPSASVLELYPGRSLEPSQVMAIVNLVATSVPELDSQVTVVDQKGNLLSD 240  
 ID4365 SVFVRDRKPSASVLELYPGRSLEPSQVMAIVNLVATSVPELDSQVTVVDQKGNLLSD 240  
 M10 SVFVRDRKPSASVLELYPGRSLEPSQVMAIVNLVATSVPELDSQVTVVDQKGNLLSD 240  
 IGB83 SVFVRDRKPSASVLELYPGRSLEPSQVMAIVNLVATSVPELDSQVTVVDQKGNLLSD 240  
 \*\*\*\*\*

PA01 QQELSELTMAGKQDFTRRMEGLLTQRVHNILOPVLGNGRYKAEVSADVDFSAVESTSEM 300  
 148 QQELSELTMAGKQDFTRRMEGLLTQRVHNILOPVLGNGRYKAEVSADVDFSAVESTSEM 300  
 ID4365 QQELSELTMAGKQDFTRRMEGLLTQRVHNILOPVLGNGRYKAEVSADVDFSAVESTSEM 300  
 M10 QQELSELTMAGKQDFTRRMEGLLTQRVHNILOPVLGNGRYKAEVSADVDFSAVESTSEM 300  
 IGB83 QQELSELTMAGKQDFTRRMEGLLTQRVHNILOPVLGNGRYKAEVSADVDFSAVESTSEM 300  
 \*\*\*\*\*

PA01 YNPDQALRSEQRNNEERQNSSGPGVPGALSNQPPGPASAPQATASAPADYVAPGQPL 360  
 148 YNPDQALRSEQRNNEERQNSSGPGVPGALSNQPPGPASAPQATASAPADYVAPGQPL 360  
 ID4365 YNPDQALRSEQRNNEERQNSSGPGVPGALSNQPPGPASAPQATASAPADYVAPGQPL 360  
 M10 YNPDQALRSEQRNNEERQNSSGPGVPGALSNQPPGPASAPQATASAPADYVAPGQPL 360  
 IGB83 YNPDQALRSEQRNNEERQNSSGPGVPGALSNQPPGPASAPQATASAPADYVAPGQPL 360  
 \*\*\*\*\*

PA01 KDANGQTIIDPKTGKPELAPYPTDKRDQTRNYELDRSISYTKQQGRLRRLSVAVVLDD 420  
 148 KDANGQTIIDPKTGKPELAPYPTDKRDQTRNYELDRSISYTKQQGRLRRLSVAVVLDD 420  
 ID4365 KDANGQTIIDPKTGKPELAPYPTDKRDQTRNYELDRSISYTKQQGRLRRLSVAVVLDD 420  
 M10 KDANGQTIIDPKTGKPELAPYPTDKRDQTRNYELDRSISYTKQQGRLRRLSVAVVLDD 420  
 IGB83 KDANGQTIIDPKTGKPELAPYPTDKRDQTRNYELDRSISYTKQQGRLRRLSVAVVLDD 420  
 \*\*\*\*\*

PA01 QMKVDAKTGEVSHQPWSADELARFTRLVQDSVGYDASRGDSVSVINAPFAPAQAEIDS I 480  
 148 QMKVDAKTGEVSHQPWSADELARFTRLVQDSVGYDASRGDSVSVINAPFAPAQAEIDS I 480  
 ID4365 QMKVDAKTGEVSHQPWSADELARFTRLVQDSVGYDASRGDSVSVINAPFAPAQAEIDS I 480  
 M10 QMKVDAKTGEVSHQPWSADELARFTRLVQDSVGYDASRGDSVSVINAPFAPAQAEIDS I 480  
 IGB83 QMKVDAKTGEVSHQPWSADELARFTRLVQDSVGYDASRGDSVSVINAPFAPAQAEIDS I 480  
 \*\*\*\*\*

PA01 PFYSQPWFWDIVKQVLGVLFILVLFVGVLRPVLVSNITGGGKGS LAGGGGRDGLALGES 540  
 148 PFYSQPWFWDIVKQVLGVLFILVLFVGVLRPVLVSNITGGGKGS LAGGGGRDGLALGES 540  
 ID4365 PFYSQPWFWDIVKQVLGVLFILVLFVGVLRPVLVSNITGGGKGS LAGGGGRDGLALGES 540  
 M10 PFYSQPWFWDIVKQVLGVLFILVLFVGVLRPVLVSNITGGGKGS LAGGGGRDGLALGES 540  
 IGB83 PFYSQPWFWDIVKQVLGVLFILVLFVGVLRPVLVSNITGGGKGS LAGGGGRDGLALGES 540  
 \*\*\*\*\*

PA01 GLEGLADDRVSIGGPSSILLPSPTTEGYDAQLNAIKNLVAQDPGRVAQVVKWINADE 598  
148 GLEGLADDRVSIGGPSSILLPSPTTEGYDAQLNAIKNLVAQDPGRVAQVVKWINADE 598  
ID4365 GLEGLADDRVSIGGPSSILLPSPTTEGYDAQLNAIKNLVAQDPGRVAQVVKWINADE 598  
M10 GLEGLADDRVSIGGPSSILLPSPTTEGYDAQLNAIKNLVAQDPGRVAQVVKWINADE 598  
IGB83 GLEGLADDRVSIGGPSSILLPSPTTEGYDAQLNAIKNLVAQDPGRVAQVVKWINADE 598  
\*\*\*\*\*

**flig**

PA01 MSENRLAAKLTQVVKAAIILLSLGETDAAQVLRHMGPKEVQVRVGVAMASMRNVHREQVEQ 60  
148 MSENRLAAKLTQVVKAAIILLSLGETDAAQVLRHMGPKEVQVRVGVAMASMRNVHREQVEQ 60  
ID4365 MSENRLAAKLTQVVKAAIILLSLGETDAAQVLRHMGPKEVQVRVGVAMASMRNVHREQVEQ 60  
M10 MSENRLAAKLTQVVKAAIILLSLGETDAAQVLRHMGPKEVQVRVGVAMASMRNVHREQVEQ 60  
IGB83 MSENRLAAKLTQVVKAAIILLSLGETDAAQVLRHMGPKEVQVRVGVAMASMRNVHREQVEQ 60  
\*\*\*\*\*

PA01 VMGEFVEVVDQTSLVGVGADGYIRKMLTQALGEDKANNLIDRILLGGSTSGLDSLKWMEP 120  
148 VMGEFVEVVDQTSLVGVGADGYIRKMLTQALGEDKANNLIDRILLGGSTSGLDSLKWMEP 120  
ID4365 VMGEFVEVVDQTSLVGVGADGYIRKMLTQALGEDKANNLIDRILLGGSTSGLDSLKWMEP 120  
M10 VMGEFVEVVDQTSLVGVGADGYIRKMLTQALGEDKANNLIDRILLGGSTSGLDSLKWMEP 120  
IGB83 VMGEFVEVVDQTSLVGVGADGYIRKMLTQALGEDKANNLIDRILLGGSTSGLDSLKWMEP 120  
\*\*\*\*\*

PA01 RAVADVIRYEHPIQAIIVVAYLDPDQAAEVLSHFDHKVRLDIVLRVSSLNTVQPSALKEL 180  
148 RAVADVIRYEHPIQAIIVVAYLDPDQAAEVLSHFDHKVRLDIVLRVSSLNTVQPSALKEL 180  
ID4365 RAVADVIRYEHPIQAIIVVAYLDPDQAAEVLSHFDHKVRLDIVLRVSSLNTVQPSALKEL 180  
M10 RAVADVIRYEHPIQAIIVVAYLDPDQAAEVLSHFDHKVRLDIVLRVSSLNTVQPSALKEL 180  
IGB83 RAVADVIRYEHPIQAIIVVAYLDPDQAAEVLSHFDHKVRLDIVLRVSSLNTVQPSALKEL 180  
\*\*\*\*\*

PA01 NLILEKQFAGNSNATRTTMGGVKRAADIMNYLDSSIEGQLMDSIREVDEDLGQIEDLMF 240  
148 NLILEKQFAGNSNATRTTMGGVKRAADIMNYLDSSIEGQLMDSIREVDEDLGQIEDLMF 240  
ID4365 NLILEKQFAGNSNATRTTMGGVKRAADIMNYLDSSIEGQLMDSIREVDEDLGQIEDLMF 240  
M10 NLILEKQFAGNSNATRTTMGGVKRAADIMNYLDSSIEGQLMDSIREVDEDLGQIEDLMF 240  
IGB83 NLILEKQFAGNSNATRTTMGGVKRAADIMNYLDSSIEGQLMDSIREVDEDLGQIEDLMF 240  
\*\*\*\*\*

PA01 VFDNLADVDDRGIQALLREVSSDVLVLAALKGSDEAIREKVFKNMSKRAAELLRDDLEAKG 300  
148 VFDNLADVDDRGIQALLREVSSDVLVLAALKGSDEAIREKVFKNMSKRAAELLRDDLEAKG 300  
ID4365 VFDNLADVDDRGIQALLREVSSDVLVLAALKGSDEAIREKVFKNMSKRAAELLRDDLEAKG 300  
M10 VFDNLADVDDRGIQALLREVSSDVLVLAALKGSDEAIREKVFKNMSKRAAELLRDDLEAKG 300  
IGB83 VFDNLADVDDRGIQALLREVSSDVLVLAALKGSDEAIREKVFKNMSKRAAELLRDDLEAKG 300  
\*\*\*\*\*

PA01 PVRVSEVEGAQKEILTIARRMAESGDIVLGGKGEEMI 338  
148 PVRVSEVEGAQKEILTIARRMAESGDIVLGGKGEEMI 338  
ID4365 PVRVSEVEGAQKEILTIARRMAESGDIVLGGKGEEMI 338  
M10 PVRVSEVEGAQKEILTIARRMAESGDIVLGGKGEEMI 338  
IGB83 PVRVSEVEGAQKEILTIARRMAESGDIVLGGKGEEMI 338  
\*\*\*\*\*

**flii**

PA01 MRLERTSFARLEGYTEAVSLPAQPVEGRLLRMVGLTLEAEGQAQVGSRCNVINESGY 60  
148 MRLERTSFARLEGYTEAVSLPAQPVEGRLLRMVGLTLEAEGQAQVGSRCNVINESGY 60  
ID4365 MRLERTSFARLEGYTEAVSLPAQPVEGRLLRMVGLTLEAEGQAQVGSRCNVINESGY 60  
M10 MRLERTSFARLEGYTEAVSLPAQPVEGRLLRMVGLTLEAEGQAQVGSRCNVINESGY 60  
IGB83 MRLERTSFARLEGYTEAVSLPAQPVEGRLLRMVGLTLEAEGQAQVGSRCNVINESGY 60  
\*\*\*\*\*

PA01 HPVQVEAEVMGFSGSKVYLMFVGSGLAGIAPGARVVPLPDTGRLPMGMSMLGRVLDGAGRA 120  
148 HPVQVEAEVMGFSGSKVYLMFVGSGLAGIAPGARVVPLPDTGRLPMGMSMLGRVLDGAGRA 120  
ID4365 HPVQVEAEVMGFSGSKVYLMFVGSGLAGIAPGARVVPLPDTGRLPMGMSMLGRVLDGAGRA 120  
M10 HPVQVEAEVMGFSGSKVYLMFVGSGLAGIAPGARVVPLPDTGRLPMGMSMLGRVLDGAGRA 120  
IGB83 HPVQVEAEVMGFSGSKVYLMFVGSGLAGIAPGARVVPLPDTGRLPMGMSMLGRVLDGAGRA 120  
\*\*\*\*\*

PA01 LDGKGMRAEDWVPMDGPTINPLKRHPISEPLDVGIRSINGLLTVGRGQRLGLFAGTGVG 180  
148 LDGKGMRAEDWVPMDGPTINPLKRHPISEPLDVGIRSINGLLTVGRGQRLGLFAGTGVG 180  
ID4365 LDGKGMRAEDWVPMDGPTINPLKRHPISEPLDVGIRSINGLLTVGRGQRLGLFAGTGVG 180  
M10 LDGKGMRAEDWVPMDGPTINPLKRHPISEPLDVGIRSINGLLTVGRGQRLGLFAGTGVG 180  
IGB83 LDGKGMRAEDWVPMDGPTINPLKRHPISEPLDVGIRSINGLLTVGRGQRLGLFAGTGVG 180  
\*\*\*\*\*

PA01 KSVLLGMMTRFRTRADIIVVGLIGERGREVKEFIDEILGEEGLKRSVVVASPADDAPLMRL 240  
148 KSVLLGMMTRFRTRADIIVVGLIGERGREVKEFIDEILGEEGLKRSVVVASPADDAPLMRL 240  
ID4365 KSVLLGMMTRFRTRADIIVVGLIGERGREVKEFIDEILGEEGLKRSVVVASPADDAPLMRL 240  
M10 KSVLLGMMTRFRTRADIIVVGLIGERGREVKEFIDEILGEEGLKRSVVVASPADDAPLMRL 240  
IGB83 KSVLLGMMTRFRTRADIIVVGLIGERGREVKEFIDEILGEEGLKRSVVVASPADDAPLMRL 240  
\*\*\*\*\*

PA01 RAAQYCTRIAEYFRDKGNVLLMDSLTRYAQAQREIALAIGEPATKGYPPSVFAKLPK 300  
148 RAAQYCTRIAEYFRDKGNVLLMDSLTRYAQAQREIALAIGEPATKGYPPSVFAKLPK 300  
ID4365 RAAQYCTRIAEYFRDKGNVLLMDSLTRYAQAQREIALAIGEPATKGYPPSVFAKLPK 300

M10 RAAQYCTRIAEYFRDKGNVLLMDSLTRYAQAQREIALAIGEPATKGYPPSVFAKLPK 300  
IGB83 RAAQYCTRIAEYFRDKGNVLLMDSLTRYAQAQREIALAIGEPATKGYPPSVFAKLPK 300  
\*\*\*\*\*

PA01 LVERAGNAEAGGGSITAFYTVLSEGGDDQDDPIADAARGVLDGHFVLSRRLAEEGHYPAID 360  
148 LVERAGNAEAGGGSITAFYTVLSEGGDDQDDPIADAARGVLDGHFVLSRRLAEEGHYPAID 360  
ID4365 LVERAGNAEAGGGSITAFYTVLSEGGDDQDDPIADAARGVLDGHFVLSRRLAEEGHYPAID 360  
M10 LVERAGNAEAGGGSITAFYTVLSEGGDDQDDPIADAARGVLDGHFVLSRRLAEEGHYPAID 360  
IGB83 LVERAGNAEAGGGSITAFYTVLSEGGDDQDDPIADAARGVLDGHFVLSRRLAEEGHYPAID 360  
\*\*\*\*\*

PA01 IEASISRVMPQVVEAEHLRDAQRFKQLWSRYQQSRDLISVGAYVAGGDPETDLAIARFPV 420  
148 IEASISRVMPQVVEAEHLRDAQRFKQLWSRYQQSRDLISVGAYVAGGDPETDLAIARFPV 420  
ID4365 IEASISRVMPQVVEAEHLRDAQRFKQLWSRYQQSRDLISVGAYVAGGDPETDLAIARFPV 420  
M10 IEASISRVMPQVVEAEHLRDAQRFKQLWSRYQQSRDLISVGAYVAGGDPETDLAIARFPV 420  
IGB83 IEASISRVMPQVVEAEHLRDAQRFKQLWSRYQQSRDLISVGAYVAGGDPETDLAIARFPV 420  
\*\*\*\*\*

PA01 MRQFLRQGLDESESLAESRARLASLLAGGQA 451  
148 MRQFLRQGLDESESLAESRARLASLLAGGQA 451  
ID4365 MRQFLRQGLDESESLAESRARLASLLAGGQA 451  
M10 MRQFLRQGLDESESLAESRARLASLLAGGQA 451  
IGB83 MRQFLRQGLDESESLAESRARLASLLAGGQA 451  
\*\*\*\*\*

**flij**

IGB83 MEKRAARLAPVDDMASKAERDAATQLGRCQQQLLAAQKLAELERYRNDYQQQWISQGQK 60  
M10 MEKRAARLAPVDDMASKAERDAATQLGRCQQQLLAAQKLAELERYRNDYQQQWISQGQK 60  
PA01 MEKRAARLAPVDDMASKAERDAATQLGRCQQQLLAAQKLAELERYRNDYQQQWISQGQK 60  
148 MEKRAARLAPVDDMASKAERDAATQLGRCQQQLLAAQKLAELERYRNDYQQQWISQGQK 60  
ID4365 MEKRAARLAPVDDMASKAERDAATQLGRCQQQLLAAQKLAELERYRNDYQQQWISQGQK 60  
\*\*\*\*\*

IGB83 GVSGQWLMNYQRFLSQLETAVAQQANSVTWHREAVDKARLNWQERYARLEGLRKLVERYL 120  
M10 GVSGQWLMNYQRFLSQLETAVAQQANSVTWHREAVDKARLNWQERYARLEGLRKLVERYL 120  
PA01 GVSGQWLMNYQRFLSQLETAVAQQANSVTWHREAVDKARLNWQERYARLEGLRKLVERYL 120  
148 GVSGQWLMNYQRFLSQLETAVAQQANSVTWHREAVDKARLNWQERYARLEGLRKLVERYL 120  
ID4365 GVSGQWLMNYQRFLSQLETAVAQQANSVTWHREAVDKARLNWQERYARLEGLRKLVERYL 120  
\*\*\*\*\*

IGB83 EEARQAEDKREKQKQLELAQRTRRQDD 147  
M10 EEARQAEDKREKQKQLELAQRTRRQDD 147  
PA01 EEARQAEDKREKQKQLELAQRTRRQDD 147  
148 EEARQAEDKREKQKQLELAQRTRRQDD 147  
ID4365 EEARQAEDKREKQKQLELAQRTRRQDD 147  
\*\*\*\*\*

**flii**

PA01 MAVQDLLSQDEIDALLHGVDGLVETEVEATPGSVKSYDLTSQDRIVRGRMPTLEMINER 60  
148 MAVQDLLSQDEIDALLHGVDGLVETEVEATPGSVKSYDLTSQDRIVRGRMPTLEMINER 60  
ID4365 MAVQDLLSQDEIDALLHGVDGLVETEVEATPGSVKSYDLTSQDRIVRGRMPTLEMINER 60  
M10 MAVQDLLSQDEIDALLHGVDGLVETEVEATPGSVKSYDLTSQDRIVRGRMPTLEMINER 60  
IGB83 MAVQDLLSQDEIDALLHGVDGLVETEVEATPGSVKSYDLTSQDRIVRGRMPTLEMINER 60  
\*\*\*\*\*

PA01 FARYTRISMFNLLRRSADVAVGGVQVMKFGEYVHSLYVPTSLNLVKMKPLRGTAFLDA 120  
148 FARYTRISMFNLLRRSADVAVGGVQVMKFGEYVHSLYVPTSLNLVKMKPLRGTAFLDA 120  
ID4365 FARYTRISMFNLLRRSADVAVGGVQVMKFGEYVHSLYVPTSLNLVKMKPLRGTAFLDA 120  
M10 FARYTRISMFNLLRRSADVAVGGVQVMKFGEYVHSLYVPTSLNLVKMKPLRGTAFLDA 120  
IGB83 FARYTRISMFNLLRRSADVAVGGVQVMKFGEYVHSLYVPTSLNLVKMKPLRGTAFLDA 120  
\*\*\*\*\*

PA01 KLVFKLVDNFFGGDGRHAKIEGREFTPTTELVRVMVLEQAFVDLKEAWQAVLEMNFEYVN 180  
148 KLVFKLVDNFFGGDGRHAKIEGREFTPTTELVRVMVLEQAFVDLKEAWQAVLEMNFEYVN 180  
ID4365 KLVFKLVDNFFGGDGRHAKIEGREFTPTTELVRVMVLEQAFVDLKEAWQAVLEMNFEYVN 180  
M10 KLVFKLVDNFFGGDGRHAKIEGREFTPTTELVRVMVLEQAFVDLKEAWQAVLEMNFEYVN 180  
IGB83 KLVFKLVDNFFGGDGRHAKIEGREFTPTTELVRVMVLEQAFVDLKEAWQAVLEMNFEYVN 180  
\*\*\*\*\*

PA01 SEVNPAMANIVSPSEVVVSTFHIELDGGGGDLHITMPYSMIEPIREMLDAGFQSDHDDQ 240  
148 SEVNPAMANIVSPSEVVVSTFHIELDGGGGDLHITMPYSMIEPIREMLDAGFQSDHDDQ 240  
ID4365 SEVNPAMANIVSPSEVVVSTFHIELDGGGGDLHITMPYSMIEPIREMLDAGFQSDHDDQ 240  
M10 SEVNPAMANIVSPSEVVVSTFHIELDGGGGDLHITMPYSMIEPIREMLDAGFQSDHDDQ 240  
IGB83 SEVNPAMANIVSPSEVVVSTFHIELDGGGGDLHITMPYSMIEPIREMLDAGFQSDHDDQ 240  
\*\*\*\*\*

PA01 DERWIKALREDVLDVQVPLGATVRRQLKLRDILHMOPGDVIPVEMPEHMVMRANGVPAF 300  
148 DERWIKALREDVLDVQVPLGATVRRQLKLRDILHMOPGDVIPVEMPEHMVMRANGVPAF 300  
ID4365 DERWIKALREDVLDVQVPLGATVRRQLKLRDILHMOPGDVIPVEMPEHMVMRANGVPAF 300  
M10 DERWIKALREDVLDVQVPLGATVRRQLKLRDILHMOPGDVIPVEMPEHMVMRANGVPAF 300  
IGB83 DERWIKALREDVLDVQVPLGATVRRQLKLRDILHMOPGDVIPVEMPEHMVMRANGVPAF 300

\*\*\*\*\*:\*\*\*\*\*

PA01 KVKLGAHKGNLALQILEAVERSR 323
148 KVKLGAHKGNLALQILEAVERSR 323
ID4365 KVKLGAHKGNLALQILEAVERSR 323
M10 KVKLGAHKGNLALQILEAVERSR 323
IGB83 KVKLGAHKGNLALQILEAVERSR 323
\*\*\*\*\*

fliN

PA01 MADEEKVTTTEQALADEWAAALAEAGDASQDDIDALMAQGGATPVAEPSTPRAPMEEFGA 60
148 MADEEKVTTTEQALADEWAAALAEAGDASQDDIDALMAQGGATPVAEPSTPRAPMEEFGA 60
ID4365 MADEEKVTTTEQALADEWAAALAEAGDASQDDIDALMAQGGATPVAEPSTPRAPMEEFGA 60
M10 MADEEKVTTTEQALADEWAAALAEAGDASQDDIDALMAQGGATPVAEPSTPRAPMEEFGA 60
IGB83 MADEEKVTTTEQALADEWAAALAEAGDASQDDIDALMAQGGATPVAEPSTPRAPMEEFGA 60
\*\*\*\*\*

PA01 SPKAPTISGLEGNLDVILDIPVTISMEVGHTDISIRNLLQLNQGSVIELDRDLAGEPLDV 120
148 SPKAPTISGLEGNLDVILDIPVTISMEVGHTDISIRNLLQLNQGSVIELDRDLAGEPLDV 120
ID4365 SPKAPTISGLEGNLDVILDIPVTISMEVGHTDISIRNLLQLNQGSVIELDRDLAGEPLDV 120
M10 SPKAPTISGLEGNLDVILDIPVTISMEVGHTDISIRNLLQLNQGSVIELDRDLAGEPLDV 120
IGB83 SPKAPTISGLEGNLDVILDIPVTISMEVGHTDISIRNLLQLNQGSVIELDRDLAGEPLDV 120
\*\*\*\*\*

PA01 LVNGTLIAHGEVVVNEKFGIRLTDVISPSEIKKLR 157
148 LVNGTLIAHGEVVVNEKFGIRLTDVISPSEIKKLR 157
ID4365 LVNGTLIAHGEVVVNEKFGIRLTDVISPSEIKKLR 157
M10 LVNGTLIAHGEVVVNEKFGIRLTDVISPSEIKKLR 157
IGB83 LVNGTLIAHGEVVVNEKFGIRLTDVISPSEIKKLR 157
\*\*\*\*\*

flio

IGB83 MRRYLFAGFLPALASLSAPLCAAEGTTGAAAPTVAASGAAQLAQLVGLGLVIGLIFL 60
M10 MRRYLFAGFLPALASLSAPLCAAEGTTGAAAPTVAASGAAQLAQLVGLGLVIGLIFL 60
ID4365 MRRYLFAGFLPALASLSAPLCAAEGTTGAAAPTVAASGAAQLAQLVGLGLVIGLIFL 60
PA01 MRRYLFAGFLPALASLSAPLCAAEGTTGAAAPTVAASGAAQLAQLVGLGLVIGLIFL 60
148 MRRYLFAGFLPALASLSAPLCAAEGTTGAAAPTVAASGAAQLAQLVGLGLVIGLIFL 60
\*\*\*\*\*

IGB83 LAWLVRVQQAGPRGNRLIRTLASQPLGPRDRLVVLVQVGEQIILGLTPGRITPLHVLKE 120
M10 LAWLVRVQQAGPRGNRLIRTLASQPLGPRDRLVVLVQVGEQIILGLTPGRITPLHVLKE 120
ID4365 LAWLVRVQQAGPRGNRLIRTLASQPLGPRDRLVVLVQVGEQIILGLTPGRITPLHVLKE 120
PA01 LAWLVRVQQAGPRGNRLIRTLASQPLGPRDRLVVLVQVGEQIILGLTPGRITPLHVLKE 120
148 LAWLVRVQQAGPRGNRLIRTLASQPLGPRDRLVVLVQVGEQIILGLTPGRITPLHVLKE 120
\*\*\*\*\*

IGB83 PVHLPDGEFATPEFAQRLELLNKDPKPKP 150
M10 PVHLPDGEFATPEFAQRLELLNKDPKPKP 150
ID4365 PVHLPDGEFATPEFAQRLELLNKDPKPKP 150
PA01 PVHLPDGEFATPEFAQRLELLNKDPKPKP 150
148 PIHLPDGEFATPEFAQRLELLNKDPKPKP 150
\*:\*\*\*\*\*

fliP

PA01 MTPRISLAGALAALCLLLLAPWPALAADPTSISAITVTTNGQGQEQEYSVSLQILLIMTAL 60
148 MTPRISLAGALAALCLLLLAPWPALAADPTSISAITVTTNGQGQEQEYSVSLQILLIMTAL 60
ID4365 MTPRISLAGALAALCLLLLAPWPALAADPTSISAITVTTNGQGQEQEYSVSLQILLIMTAL 60
M10 MTPRISLAGALAALCLLLLAPWPALAADPTSISAITVTTNGQGQEQEYSVSLQILLIMTAL 60
IGB83 MTPRISLAGALAALCLLLLAPWPALAADPTSISAITVTTNGQGQEQEYSVSLQILLIMTAL 60
\*\*\*\*\*

PA01 SFIPAFVMLMSTFTRIIIVFSILRQALGLQSTPSNQVLVGLALFLTMFVMAPVFDKINSQ 120
148 SFIPAFVMLMSTFTRIIIVFSILRQALGLQSTPSNQVLVGLALFLTMFVMAPVFDKINSQ 120
ID4365 SFIPAFVMLMSTFTRIIIVFSILRQALGLQSTPSNQVLVGLALFLTMFVMAPVFDKINSQ 120
M10 SFIPAFVMLMSTFTRIIIVFSILRQALGLQSTPSNQVLVGLALFLTMFVMAPVFDKINSQ 120
IGB83 SFIPAFVMLMSTFTRIIIVFSILRQALGLQSTPSNQVLVGLALFLTMFVMAPVFDKINSQ 120
\*\*\*\*\*

PA01 ALQPYLNEQIPAQEALQKAEVPLKAFMLAQTRTSDLELFVRLSKRTDIGSPEATPLTILV 180
148 ALQPYLNEQIPAQEALQKAEVPLKAFMLAQTRTSDLELFVRLSKRTDIGSPEATPLTILV 180
ID4365 ALQPYLNEQIPAQEALQKAEVPLKAFMLAQTRTSDLELFVRLSKRTDIGSPEATPLTILV 180
M10 ALQPYLNEQIPAQEALQKAEVPLKAFMLAQTRTSDLELFVRLSKRTDIGSPEATPLTILV 180
IGB83 ALQPYLNEQIPAQEALQKAEVPLKAFMLAQTRTSDLELFVRLSKRTDIGSPEATPLTILV 180
\*\*\*\*\*

PA01 PAFVTSELKTAFAQIGFMIFIPFLIIDLVSSVLMAMGMMMLSPLIISLPPKIMLFVLVDG 240
148 PAFVTSELKTAFAQIGFMIFIPFLIIDLVSSVLMAMGMMMLSPLIISLPPKIMLFVLVDG 240
ID4365 PAFVTSELKTAFAQIGFMIFIPFLIIDLVSSVLMAMGMMMLSPLIISLPPKIMLFVLVDG 240
M10 PAFVTSELKTAFAQIGFMIFIPFLIIDLVSSVLMAMGMMMLSPLIISLPPKIMLFVLVDG 240
IGB83 PAFVTSELKTAFAQIGFMIFIPFLIIDLVSSVLMAMGMMMLSPLIISLPPKIMLFVLVDG 240

\*\*\*\*\*

PA01 WALIIGTLAGSFGTV 255  
148 WALIIGTLAGSFGTV 255  
ID4365 WALIIGTLAGSFGTV 255  
M10 WALIIGTLAGSFGTV 255  
IGB83 WALIIGTLAGSFGTV 255  
\*\*\*\*\*

**fliq**

PA01 MTPEVALDLFREALWLTAMIVGVLVPSLLVGLVVAMFQAATQINEQTL SFLPRLMVILL 60  
148 MTPEVALDLFREALWLTAMIVGVLVPSLLVGLVVAMFQAATQINEQTL SFLPRLMVILL 60  
ID4365 MTPEVALDLFREALWLTAMIVGVLVPSLLVGLVVAMFQAATQINEQTL SFLPRLMVILL 60  
M10 MTPEVALDLFREALWLTAMIVGVLVPSLLVGLVVAMFQAATQINEQTL SFLPRLMVILL 60  
IGB83 MTPEVALDLFREALWLTAMIVGVLVPSLLVGLVVAMFQAATQINEQTL SFLPRLMVILL 60  
\*\*\*\*\*

PA01 TLIVLGPWLLRQLMEYTQT LIGNIPLLIG 89  
148 TLIVLGPWLLRQLMEYTQT LIGNIPLLIG 89  
ID4365 TLIVLGPWLLRQLMEYTQT LIGNIPLLIG 89  
M10 TLIVLGPWLLRQLMEYTQT LIGNIPLLIG 89  
IGB83 TLIVLGPWLLRQLMEYTQT LIGNIPLLIG 89  
\*\*\*\*\*

**fliR**

ID4365 MLEL TNAQIGGWIASFVLP LFRVAALLMTPVIGTQLV PVRVRYLALGVCVVLVPNLPP 60  
IGB83 MLEL TNAQIGGWIASFVLP LFRVAALLMTPVIGTQLV PVRVRYLALGVCVVLVPNLPP 60  
148 MLEL TNAQIGGWIASFVLP LFRVAALLMTPVIGTQLV PVRVRYLALGVCVVLVPNLPP 60  
PA01 MLEL TNAQIGGWIASFVLP LFRVAALLMTPVIGTQLV PVRVRYLALGVCVVLVPNLPS 60  
M10 MLEL TNAQIGGWIASFVLP LFRVAALLMTPVIGTQLV PVRVRYLALGVCVVLVPNLPS 60  
\*\*\*\*\*

ID4365 MPQVDALSMKAMLLIGE QILVGALLGFSLQLLFHAFV IAGQIISMOMGLGFASMVDPANG 120  
IGB83 MPQVDALSMKAMLLIGE QILVGALLGFSLQLLFHAFV IAGQIISMOMGLGFASMVDPANG 120  
148 MPQVDALSMKAMLLIGE QILVGALLGFSLQLLFHAFV IAGQIISMOMGLGFASMVDPANG 120  
PA01 MPQVDALSMKAMLLIGE QILVGALLGFSLQLLFHAFV IAGQIISMOMGLGFASMVDPANG 120  
M10 MPQVDALSMKAMLLIGE QILVGALLGFSLQLLFHAFV IAGQIISMOMGLGFASMVDPANG 120  
\*\*\*\*\*

ID4365 VSVVPLGQFF TMLVTLLFLAMNGHLVVFEVIAESFV TLPVGEGLSGNHFVIIAGKLGWVM 180  
IGB83 VSVVPLGQFF TMLVTLLFLAMNGHLVVFEVIAESFV TLPVGEGLSGNHFVIIAGKLGWVM 180  
148 VSVVPLGQFF TMLVTLLFLAMNGHLVVFEVIAESFV TLPVGEGLSGNHFVIIAGKLGWVM 180  
PA01 VSVVPLGQFF TMLVTLLFLAMNGHLVVFEVIAESFV TLPVGEGLSGNHFVIIAGKLGWVM 180  
M10 VSVVPLGQFF TMLVTLLFLAMNGHLVVFEVIAESFV TLPVGEGLSGNHFVIIAGKLGWVM 180  
\*\*\*\*\*

ID4365 GAALLLALPAITALLV VNLAFGAMTRAAPQLNIFSI GFPLTLVLGLVILWIGTADLLSQY 240  
IGB83 GAALLLALPAITALLV VNLAFGAMTRAAPQLNIFSI GFPLTLVLGLVILWIGTADLLSQY 240  
148 GAALLLALPAITALLV VNLAFGAMTRAAPQLNIFSI GFPLTLVLGLVILWIGTADLLSQY 240  
PA01 GAALLLALPAITALLV VNLAFGAMTRAAPQLNIFSI GFPLTLVLGLVILWIGTADLLSQY 240  
M10 GAALLLALPAITALLV VNLAFGAMTRAAPQLNIFSI GFPLTLVLGLVILWIGTADLLSQY 240  
\*\*\*\*\*

ID4365 QVLAGEALQFLRELVR AK 258  
IGB83 QVLAGEALQFLRELVR AK 258  
148 QVLAGEALQFLRELVR AK 258  
PA01 QVLAGEALQFLRELVR AK 258  
M10 QVLAGEALQFLRELVR AK 258  
\*\*\*\*\*

**flgB**

PA01 MSISFDRALGIHQALS FRAQRAEVLANNLANADTP NYKARDLDFAAVLAEQDKAAKGT 60  
148 MSISFDRALGIHQALS FRAQRAEVLANNLANADTP NYKARDLDFAAVLAEQDKAAKGT 60  
ID4365 MSISFDRALGIHQALS FRAQRAEVLANNLANADTP NYKARDLDFAAVLAEQDKAAKGT 60  
M10 MSISFDRALGIHQALS FRAQRAEVLANNLANADTP NYKARDLDFAAVLAEQDKAAKGT 60  
IGB83 MSISFDRALGIHQALS FRAQRAEVLANNLANADTP NYKARDLDFAAVLAEQDKAAKGT 60  
\*\*\*\*\*

PA01 FATR TTNERHIAAEGFGMGE GSLQYRIPVQPSIDQNTV DAEQANYAENAMHFQASFTF 120  
148 FATR TTNERHIAAEGFGMGE GSLQYRIPVQPSIDQNTV DAEQANYAENAMHFQASFTF 120  
ID4365 FATR TTNERHIAAEGFGMGE GSLQYRIPVQPSIDQNTV DAEQANYAENAMHFQASFTF 120  
M10 FATR TTNERHIAAEGFGMGE GSLQYRIPVQPSIDQNTV DAEQANYAENAMHFQASFTF 120  
IGB83 FATR TTNERHIAAEGFGMGE GSLQYRIPVQPSIDQNTV DAEQANYAENAMHFQASFTF 120  
\*\*\*\*\*

PA01 LNSKFKGLVSALRGE 135  
148 LNSKFKGLVSALRGE 135  
ID4365 LNSKFKGLVSALRGE 135  
M10 LNSKFKGLVSALRGE 135  
IGB83 LNSKFKGLVSALRGE 135

\*\*\*\*\*

**flgC**

PA01 MSLSAVFNIAGSGMSAQSTRLNTVASNIANAETVSSSDKTYRARHPVFSMTFQQAQGDS 60  
148 MSLSAVFNIAGSGMSAQSTRLNTVASNIANAETVSSSDKTYRARHPVFSMTFQQAQGDS 60  
ID4365 MSLSAVFNIAGSGMSAQSTRLNTVASNIANAETVSSSDKTYRARHPVFSMTFQQAQGDS 60  
M10 MSLSAVFNIAGSGMSAQSTRLNTVASNIANAETVSSSDKTYRARHPVFSMTFQQAQGDS 60  
IGB83 MSLSAVFNIAGSGMSAQSTRLNTVASNIANAETVSSSDKTYRARHPVFSMTFQQAQGDS 60  
\*\*\*\*\*

PA01 GSLFADQDSSGAGVQVLGIVEDQSSSLMPRYEPNHPAADANGYVYYPNVNVVEEMADMISA 120  
148 GSLFADQDSSGAGVQVLGIVEDQSSSLMPRYEPNHPAADANGYVYYPNVNVVEEMADMISA 120  
ID4365 GSLFADQDSSGAGVQVLGIVEDQSSSLMPRYEPNHPAADANGYVYYPNVNVVEEMADMISA 120  
M10 GSLFADQDSSGAGVQVLGIVEDQSSSLMPRYEPNHPAADANGYVYYPNVNVVEEMADMISA 120  
IGB83 GSLFADQDSSGAGVQVLGIVEDQSSSLMPRYEPNHPAADANGYVYYPNVNVVEEMADMISA 120  
\*\*\*\*\*

PA01 SRAFQTNAEMMNTAKQMMQKVLTLGQ 146  
148 SRAFQTNAEMMNTAKQMMQKVLTLGQ 146  
ID4365 SRAFQTNAEMMNTAKQMMQKVLTLGQ 146  
M10 SRAFQTNAEMMNTAKQMMQKVLTLGQ 146  
IGB83 SRAFQTNAEMMNTAKQMMQKVLTLGQ 146  
\*\*\*\*\*

**flgD**

PA01 MSIDNVSGTSSNTGNVNGSKRAAGSGATETGQSVKGSNLGKDEFLKLLVAQLKNQDPMS 60  
148 MSIDNVSGTSSNTGNVNGSKRAAGSGATETGQSVKGSNLGKDEFLKLLVAQLKNQDPMS 60  
IGB83 MSIDNVSGTSSNTGNVNGSKRAAGSGATETGQSVKGSNLGKDEFLKLLVAQLKNQDPMS 60  
M10 MSIDNVSGTSSNTGNVNGSKRAAGSGATETGQSVKGSNLGKDEFLKLLVAQLKNQDPMS 60  
ID4365 MSIDNVSGTSSNTGNVNGSKRAAGSGATETGQSVKGSNLGKDEFLKLLVAQLKNQDPMS 60  
\*\*\*\*\*

PA01 PQQNGEFIAQLAQFSTVEGVQSLNKSMSILSNYQSSQALQASSLVGRKVIIVATDKSVVD 120  
148 PQQNGEFIAQLAQFSTVEGVQSLNKSMSILSNYQSSQALQASSLVGRKVIIVATDKSVVD 120  
IGB83 PQQNGEFIAQLAQFSTVEGVQSLNKSMSILSNYQSSQALQASSLVGRKVIIVATDKSVVD 120  
M10 PQQNGEFIAQLAQFSTVEGVQSLNKSMSILSNYQSSQALQASSLVGRKVIIVATDKSVVD 120  
ID4365 PQQNGEFIAQLAQFSTVEGVQSLNKSMSILSNYQSSQALQASSLVGRKVIIVATDKSVVD 120  
\*\*\*\*\*

PA01 TKDTPKASLNLVPSSSNVVNVYDDKGTVVNRINLQQAAGSVSFMWDGKSSGNIMPPG 180  
148 TKDTPKASLNLVPSSSNVVNVYDDKGTVVNRINLQQAAGSVSFMWDGKSSGNIMPPG 180  
IGB83 TKDTPKASLNLVPSSSNVVNVYDDKGTVVNRINLQQAAGSVSFMWDGKSSGNIMPPG 180  
M10 TKDTPKASLNLVPSSSNVVNVYDDKGTVVNRINLQQAAGSVSFMWDGKSSGNIMPPG 180  
ID4365 TKDTPKASLNLVPSSSNVVNVYDDKGTVVNRINLQQAAGSVSFMWDGKSSGNIMPPG 180  
\*\*\*\*\*

PA01 TYKFEAQTSDGKTYGLQTYLPANVDSVTLGQNGGELMLNLAGLSIALSKVQIIGQ 237  
148 TYKFEAQTSDGKTYGLQTYLPANVDSVTLGQNGGELMLNLAGLSIALSKVQIIGQ 237  
IGB83 TYKFEAQTSDGKTYGLQTYLPANVDSVTLGQNGGELMLNLAGLSIALSKVQIIGQ 237  
M10 TYKFEAQTSDGKTYGLQTYLPANVDSVTLGQNGGELMLNLAGLSIALSKVQIIGQ 237  
ID4365 TYKFEAQTSDGKTYGLQTYLPANVDSVTLGQNGGELMLNLAGLSIALSKVQIIGQ 237  
\*\*\*\*\*

**flgE**

IGB83 MSFNIGLSGIIQAASSGLNVTGNNIANAGTVGFKQSRAEFADVYAASVLGSGSNPQSGSVL 60  
M10 MSFNIGLSGIIQAASSGLNVTGNNIANAGTVGFKQSRAEFADVYAASVLGSGSNPQSGSVL 60  
PA01 MSFNIGLSGIIQAASSGLNVTGNNIANAGTVGFKQSRAEFADVYAASVLGSGSNPQSGSVL 60  
148 MSFNIGLSGIIQAASSGLNVTGNNIANAGTVGFKQSRAEFADVYAASVLGSGSNPQSGSVL 60  
ID4365 MSFNIGLSGIIQAASSGLNVTGNNIANAGTVGFKQSRAEFADVYAASVLGSGSNPQSGSVL 60  
\*\*\*\*\*

IGB83 LSDVSMQFKQGNIDSTNSVLDLAINGNGFFVTSNNGAISYTRAGYFNTDKQDFIVDNGY 120  
M10 LSDVSMQFKQGNIDSTNSVLDLAINGNGFFVTSNNGAISYTRAGYFNTDKQDFIVDNGY 120  
PA01 LSDVSMQFKQGNIDSTNSVLDLAINGNGFFVTSNNGAISYTRAGYFNTDKQDFIVDNGY 120  
148 LSDVSMQFKQGNIDSTNSVLDLAINGNGFFVTSNNGAISYTRAGYFNTDKQDFIVDNGY 120  
ID4365 LSDVSMQFKQGNIDSTNSVLDLAINGNGFFVTSNNGAISYTRAGYFNTDKQDFIVDNGY 120  
\*\*\*\*\*

IGB83 RLQGYAVGPNGQLQNGVVTDLKVNERANQAPQATSSIQQSYNLNSTLKPPTVTPFPDSDAA 180  
M10 RLQGYAVGPNGQLQNGVVTDLKVNERANQAPQATSSIQQSYNLNSTLKPPTVTPFPDSDAA 180  
PA01 RLQGYAVGPNGQLQNGVVTDLKVNERANQAPQATSSIQQSYNLNSTLKPPTVTPFPDSDAA 180  
148 RLQGYAVGPNGQLQNGVVTDLKVNERANQAPQATSSIQQSYNLNSTLKPPTVTPFPDSDAA 180  
ID4365 RLQGYAVGPNGQLQNGVVTDLKVNERANQAPQATSSIQQSYNLNSTLKPPTVTPFPDSDAA 180  
\*\*\*\*\*

IGB83 TYNSSSLGIYDSQGNSHSMTSQFFIKNEPDPNATPPIPENSWTMKVLIDGVNPLDPSNKT 240  
M10 TYNSSSLGIYDSQGNSHSMTSQFFIKNEPDPNATPPIPENSWTMKVLIDGVNPLDPSNKT 240  
PA01 TYNSSSLGIYDSQGNSHSMTSQFFIKNEPDPNATPPIPENSWTMKVLIDGVNPLDPSNKT 240  
148 TYNSSSLGIYDSQGNSHSMTSQFFIKNEPDPNATPPIPENSWTMKVLIDGVNPLDPSNKT 240  
ID4365 TYNSSSLGIYDSQGNSHSMTSQFFIKNEPDPNATPPIPENSWTMKVLIDGVNPLDPSNKT 240



\*\*\*\*\*

IGB83 PMSFNVTFDASGQMTSVRAPDGTSGPGFSDATTNVIQFSPATGNPPTPGTGWIPAASD 300  
M10 PMSFNVTFDASGQMTSVRAPDGTSGPGFSDATTNVIQFSPATGNPPTPGTGWIPAASD 300  
PA01 PMSFNVTFDASGQMTSVRAPDGTSGPGFSDATTNVIQFSPATGNPPTPGTGWIPAASD 300  
148 PMSFNVTFDASGQMTSVRAPDGTSGPGFSDATTNVIQFSPATGNPPTPGTGWIPAASD 300  
ID4365 PMSFNVTFDASGQMTSVRAPDGTSGPGFSDATTNVIQFSPATGNPPTPGTGWIPAASD 300  
\*\*\*\*\*

IGB83 GKTTPPTYAWNGATGAASGISFDMRKTQYSTAFAQSNPIQDGYTTGQLAGLEIDDTGVIF 360  
M10 GKTTPPTYAWNGATGAASGISFDMRKTQYSTAFAQSNPIQDGYTTGQLAGLEIDDTGVIF 360  
PA01 GKTTPPTYAWNGATGAASGISFDMRKTQYSTAFAQSNPIQDGYTTGQLAGLEIDDTGVIF 360  
148 GKTTPPTYAWNGATGAASGISFDMRKTQYSTAFAQSNPIQDGYTTGQLAGLEIDDTGVIF 360  
ID4365 GKTTPPTYAWNGATGAASGISFDMRKTQYSTAFAQSNPIQDGYTTGQLAGLEIDDTGVIF 360  
\*\*\*\*\*

IGB83 ARYTNGQSKVQGVVLANFANIQGLTPIGKTSWVQSSSEGEPAVGAPRSGLGALQSGAL 420  
M10 ARYTNGQSKVQGVVLANFANIQGLTPIGKTSWVQSSSEGEPAVGAPRSGLGALQSGAL 420  
PA01 ARYTNGQSKVQGVVLANFANIQGLTPIGKTSWVQSSSEGEPAVGAPRSGLGALQSGAL 420  
148 ARYTNGQSKVQGVVLANFANIQGLTPIGKTSWVQSSSEGEPAVGAPRSGLGALQSGAL 420  
ID4365 ARYTNGQSKVQGVVLANFANIQGLTPIGKTSWVQSSSEGEPAVGAPRSGLGALQSGAL 420  
\*\*\*\*\*

IGB83 EASNVDISNELVNLIVHQRNYQANAKTIQTEDAVTQTIINLR 462  
M10 EASNVDISNELVNLIVHQRNYQANAKTIQTEDAVTQTIINLR 462  
PA01 EASNVDISNELVNLIVHQRNYQANAKTIQTEDAVTQTIINLR 462  
148 EASNVDISNELVNLIVHQRNYQANAKTIQTEDAVTQTIINLR 462  
ID4365 EASNVDISNELVNLIVHQRNYQANAKTIQTEDAVTQTIINLR 462  
\*\*\*\*\*

**flgF**

PA01 MDKMLYVSMGASQNTLAMRAHANNLANISTSGFRDRFEQARSMQVFGDSFPPARVFMSE 60  
148 MDKMLYVSMGASQNTLAMRAHANNLANISTSGFRDRFEQARSMQVFGDSFPPARVFMSE 60  
ID4365 MDKMLYVSMGASQNTLAMRAHANNLANISTSGFRDRFEQARSMQVFGDSFPPARVFMSE 60  
M10 MDKMLYVSMGASQNTLAMRAHANNLANISTSGFRDRFEQARSMQVFGDSFPPARVFMSE 60  
IGB83 MDKMLYVSMGASQNTLAMRAHANNLANISTSGFRDRFEQARSMQVFGDSFPPARVFMSE 60  
\*\*\*\*\*

PA01 RPGTDFSHGSLQETGNELDIAIDGDFVAVQAPDGESEAYVRTAGMHIDALGMLRTGDGLP 120  
148 RPGTDFSHGSLQETGNELDIAIDGDFVAVQAPDGESEAYVRTAGMHIDALGMLRTGDGLP 120  
ID4365 RPGTDFSHGSLQETGNELDIAIDGDFVAVQAPDGESEAYVRTAGMHIDALGMLRTGDGLP 120  
M10 RPGTDFSHGSLQETGNELDIAIDGDFVAVQAPDGESEAYVRTAGMHIDALGMLRTGDGLP 120  
IGB83 RPGTDFSHGSLQETGNELDIAIDGDFVAVQAPDGESEAYVRTAGMHIDALGMLRTGDGLP 120  
\*\*\*\*\*

PA01 VLGNGGPIAVPPEEKVEIGDGTISIRALGENPNVVAVVDRIKLVNPNLKQMEKGTDGLL 180  
148 VLGNGGPIAVPPEEKVEIGDGTISIRALGENPNVVAVVDRIKLVNPNLKQMEKGTDGLL 180  
ID4365 VLGNGGPIAVPPEEKVEIGDGTISIRALGENPNVVAVVDRIKLVNPNLKQMEKGTDGLL 180  
M10 VLGNGGPIAVPPEEKVEIGDGTISIRALGENPNVVAVVDRIKLVNPNLKQMEKGTDGLL 180  
IGB83 VLGNGGPIAVPPEEKVEIGDGTISIRALGENPNVVAVVDRIKLVNPNLKQMEKGTDGLL 180  
\*\*\*\*\*

PA01 HYKQPGEQAPLADANVKVSGFLESSNVNAVEEMTAILSLSRQFELHVKMMRTAEDDSA 240  
148 HYKQPGEQAPLADANVKVSGFLESSNVNAVEEMTAILSLSRQFELHVKMMRTAEDDSA 240  
ID4365 HYKQPGEQAPLADANVKVSGFLESSNVNAVEEMTAILSLSRQFELHVKMMRTAEDDSA 240  
M10 HYKQPGEQAPLADANVKVSGFLESSNVNAVEEMTAILSLSRQFELHVKMMRTAEDDSA 240  
IGB83 HYKQPGEQAPLADANVKVSGFLESSNVNAVEEMTAILSLSRQFELHVKMMRTAEDDSA 240  
\*\*\*\*\*

PA01 AMARVLQIS 249  
148 AMARVLQIS 249  
ID4365 AMARVLQIS 249  
M10 AMARVLQIS 249  
IGB83 AMARVLQIS 249  
\*\*\*\*\*

**flgG**

PA01 MLSALWVSKTGLSAQDMNLTISNNLANVSTTGFKRDRAEFQDLYQIRRQPGGQSTQDS 60  
148 MLSALWVSKTGLSAQDMNLTISNNLANVSTTGFKRDRAEFQDLYQIRRQPGGQSTQDS 60  
ID4365 MLSALWVSKTGLSAQDMNLTISNNLANVSTTGFKRDRAEFQDLYQIRRQPGGQSTQDS 60  
M10 MLSALWVSKTGLSAQDMNLTISNNLANVSTTGFKRDRAEFQDLYQIRRQPGGQSTQDS 60  
IGB83 MLSALWVSKTGLSAQDMNLTISNNLANVSTTGFKRDRAEFQDLYQIRRQPGGQSTQDS 60  
\*\*\*\*\*

PA01 ELPSGLQLGTGVRVVGVTQKIFTPGSLQTTTEQPLDMAVNRRGFQVLLPDGTVSYTRDGSF 120  
148 ELPSGLQLGTGVRVVGVTQKIFTPGSLQTTTEQPLDMAVNRRGFQVLLPDGTVSYTRDGSF 120  
ID4365 ELPSGLQLGTGVRVVGVTQKIFTPGSLQTTTEQPLDMAVNRRGFQVLLPDGTVSYTRDGSF 120  
M10 ELPSGLQLGTGVRVVGVTQKIFTPGSLQTTTEQPLDMAVNRRGFQVLLPDGTVSYTRDGSF 120  
IGB83 ELPSGLQLGTGVRVVGVTQKIFTPGSLQTTTEQPLDMAVNRRGFQVLLPDGTVSYTRDGSF 120  
\*\*\*\*\*

PAO1 HLNSDGQIVTNSNGFALEPAIVVPNETQTFTVGDGTVSVTTGNAQPQVIGNIQTADFIN 180  
148 HLNSDGQIVTNSNGFALEPAIVVPNETQTFTVGDGTVSVTTGNAQPQVIGNIQTADFIN 180  
ID4365 HLNSDGQIVTNSNGFALEPAIVVPNETQTFTVGDGTVSVTTGNAQPQVIGNIQTADFIN 180  
M10 HLNSDGQIVTNSNGFALEPAIVVPNETQTFTVGDGTVSVTTGNAQPQVIGNIQTADFIN 180  
IGB83 HLNSDGQIVTNSNGFALEPAIVVPNETQTFTVGDGTVSVTTGNAQPQVIGNIQTADFIN 180  
\*\*\*\*\*

PAO1 PAGLQAIGNNLFLETGSSGAPQVGTPLNGLGTVAQNTLENSNVNVEELVNMITTQRAY 240  
148 PAGLQAIGNNLFLETGSSGAPQVGTPLNGLGTVAQNTLENSNVNVEELVNMITTQRAY 240  
ID4365 PAGLQAIGNNLFLETGSSGAPQVGTPLNGLGTVAQNTLENSNVNVEELVNMITTQRAY 240  
M10 PAGLQAIGNNLFLETGSSGAPQVGTPLNGLGTVAQNTLENSNVNVEELVNMITTQRAY 240  
IGB83 PAGLQAIGNNLFLETGSSGAPQVGTPLNGLGTVAQNTLENSNVNVEELVNMITTQRAY 240  
\*\*\*\*\*

PAO1 EMNSKVIISTADQMLSFTQNL 261  
148 EMNSKVIISTADQMLSFTQNL 261  
ID4365 EMNSKVIISTADQMLSFTQNL 261  
M10 EMNSKVIISTADQMLSFTQNL 261  
IGB83 EMNSKVIISTADQMLSFTQNL 261  
\*\*\*\*\*

**flgH**

PAO1 MNRLMIVSLLGIATLGGCVNPPPKPNDPYAPVLPRTPLPAAQNNGAIYQAGFEQNLVD 60  
148 MNRLMIVSLLGIATLGGCVNPPPKPNDPYAPVLPRTPLPAAQNNGAIYQAGFEQNLVD 60  
ID4365 MNRLMIVSLLGIATLGGCVNPPPKPNDPYAPVLPRTPLPAAQNNGAIYQAGFEQNLVD 60  
M10 MNRLMIVSLLGIATLGGCVNPPPKPNDPYAPVLPRTPLPAAQNNGAIYQAGFEQNLVD 60  
IGB83 MNRLMIVSLLGIATLGGCVNPPPKPNDPYAPVLPRTPLPAAQNNGAIYQAGFEQNLVD 60  
\*\*\*\*\*

PAO1 DRKAFRVGDIITITLNEKTQASKKANSDIQKDSKTKMGLTSLFGSGMTTNNPIGGDLSL 120  
148 DRKAFRVGDIITITLNEKTQASKKANSDIQKDSKTKMGLTSLFGSGMTTNNPIGGDLSL 120  
ID4365 DRKAFRVGDIITITLNEKTQASKKANSDIQKDSKTKMGLTSLFGSGMTTNNPIGGDLSL 120  
M10 DRKAFRVGDIITITLNEKTQASKKANSDIQKDSKTKMGLTSLFGSGMTTNNPIGGDLSL 120  
IGB83 DRKAFRVGDIITITLNEKTQASKKANSDIQKDSKTKMGLTSLFGSGMTTNNPIGGDLSL 120  
\*\*\*\*\*

PAO1 SAEYGGSRDAKGDQAGQSNLSLTSITVTVAEVLNGLSVRGEKWMFLNTGNELVRIAG 180  
148 SAEYGGSRDAKGDQAGQSNLSLTSITVTVAEVLNGLSVRGEKWMFLNTGNELVRIAG 180  
ID4365 SAEYGGSRDAKGDQAGQSNLSLTSITVTVAEVLNGLSVRGEKWMFLNTGNELVRIAG 180  
M10 SAEYGGSRDAKGDQAGQSNLSLTSITVTVAEVLNGLSVRGEKWMFLNTGNELVRIAG 180  
IGB83 SAEYGGSRDAKGDQAGQSNLSLTSITVTVAEVLNGLSVRGEKWMFLNTGNELVRIAG 180  
\*\*\*\*\*

PAO1 LVRADDIATDNTVSTRVADARITYSGTGAFADASQPGWDRFFLSPLWPF 231  
148 LVRADDIATDNTVSTRVADARITYSGTGAFADASQPGWDRFFLSPLWPF 231  
ID4365 LVRADDIATDNTVSTRVADARITYSGTGAFADASQPGWDRFFLSPLWPF 231  
M10 LVRADDIATDNTVSTRVADARITYSGTGAFADASQPGWDRFFLSPLWPF 231  
IGB83 LVRADDIATDNTVSTRVADARITYSGTGAFADASQPGWDRFFLSPLWPF 231  
\*\*\*\*\*

**flgI**

PAO1 MTKFKHLLALAALLAAGAAQAERLKDIAIQGVRTNQLIGYGLVVGLSGSGDQTTQTPF 60  
148 MTKFKHLLALAALLAAGAAQAERLKDIAIQGVRTNQLIGYGLVVGLSGSGDQTTQTPF 60  
ID4365 MTKFKHLLALAALLAAGAAQAERLKDIAIQGVRTNQLIGYGLVVGLSGSGDQTTQTPF 60  
M10 MTKFKHLLALAALLAAGAAQAERLKDIAIQGVRTNQLIGYGLVVGLSGSGDQTTQTPF 60  
IGB83 MTKFKHLLALAALLAAGAAQAERLKDIAIQGVRTNQLIGYGLVVGLSGSGDQTTQTPF 60  
\*\*\*\*\*

PAO1 TLQTFNNMLAQFGIKVPANVGNVQLKNVAASVHADLPPFAKPGQPIDVTVSSIGNAKSL 120  
148 TLQTFNNMLAQFGIKVPANVGNVQLKNVAASVHADLPPFAKPGQPIDVTVSSIGNAKSL 120  
ID4365 TLQTFNNMLAQFGIKVPANVGNVQLKNVAASVHADLPPFAKPGQPIDVTVSSIGNAKSL 120  
M10 TLQTFNNMLAQFGIKVPANVGNVQLKNVAASVHADLPPFAKPGQPIDVTVSSIGNAKSL 120  
IGB83 TLQTFNNMLAQFGIKVPANVGNVQLKNVAASVHADLPPFAKPGQPIDVTVSSIGNAKSL 120  
\*\*\*\*\*

PAO1 RGGSLMTPPLKIDGQVYAVAQGNLVVGGFDAEGRDGSKITVNVPSAGRIPAGATVERAV 180  
148 RGGSLMTPPLKIDGQVYAVAQGNLVVGGFDAEGRDGSKITVNVPSAGRIPAGATVERAV 180  
ID4365 RGGSLMTPPLKIDGQVYAVAQGNLVVGGFDAEGRDGSKITVNVPSAGRIPAGATVERAV 180  
M10 RGGSLMTPPLKIDGQVYAVAQGNLVVGGFDAEGRDGSKITVNVPSAGRIPAGATVERAV 180  
IGB83 RGGSLMTPPLKIDGQVYAVAQGNLVVGGFDAEGRDGSKITVNVPSAGRIPAGATVERAV 180  
\*\*\*\*\*

PAO1 PSGFDQGNLSLTLNLRPDTTAKRIVDRINELLPVGAHAVDGGSVRVSAPLDPNQRVDY 240  
148 PSGFDQGNLSLTLNLRPDTTAKRIVDRINELLPVGAHAVDGGSVRVSAPLDPNQRVDY 240  
ID4365 PSGFDQGNLSLTLNLRPDTTAKRIVDRINELLPVGAHAVDGGSVRVSAPLDPNQRVDY 240  
M10 PSGFDQGNLSLTLNLRPDTTAKRIVDRINELLPVGAHAVDGGSVRVSAPLDPNQRVDY 240  
IGB83 PSGFDQGNLSLTLNLRPDTTAKRIVDRINELLPVGAHAVDGGSVRVSAPLDPNQRVDY 240  
\*\*\*\*\*

PAO1 LSILENLDVQPEAVAKVIINSRTGTIVIGQNVKVSAAVTHGSLTIVSITEDPIVSQPGA 300  
148 LSILENLDVQPEAVAKVIINSRTGTIVIGQNVKVSAAVTHGSLTIVSITEDPIVSQPGA 300

ID4365 LSILENLVDPGEAVAKVIINSRTGTIVIGQNVKVSAAVTHGSLTVSITEDPIVSQPGA 300  
M10 LSILENLVDPGEAVAKVIINSRTGTIVIGQNVKVSAAVTHGSLTVSITEDPIVSQPGA 300  
IGB83 LSILENLVDPGEAVAKVIINSRTGTIVIGQNVKVSAAVTHGSLTVSITEDPIVSQPGA 300  
\*\*\*\*\*

PA01 FSNQQTAVVPRSRVNAEEETKPMFKFGPGTTLDDIVRAVNQVGAAPSDLMAILEALKQAG 360  
148 FSNQQTAVVPRSRVNAEEETKPMFKFGPGTTLDDIVRAVNQVGAAPSDLMAILEALKQAG 360  
ID4365 FSNQQTAVVPRSRVNAEEETKPMFKFGPGTTLDDIVRAVNQVGAAPSDLMAILEALKQAG 360  
M10 FSNQQTAVVPRSRVNAEEETKPMFKFGPGTTLDDIVRAVNQVGAAPSDLMAILEALKQAG 360  
IGB83 FSNQQTAVVPRSRVNAEEETKPMFKFGPGTTLDDIVRAVNQVGAAPSDLMAILEALKQAG 360  
\*\*\*\*\*

PA01 ALQADLIVI 369  
148 ALQADLIVI 369  
ID4365 ALQADLIVI 369  
M10 ALQADLIVI 369  
IGB83 ALQADLIVI 369  
\*\*\*\*\*

**flgJ**

PA01 MDSRLLSGIGAGPDSGSYTDLNRNLQKVGKDRDGEANIRKVAQEFESLFLNEMLKSMRS 60  
M10 MDSRLLSGIGAGPDSGSYTDLNRNLQKVGKDRDGEANIRKVAQEFESLFLNEMLKSMRS 60  
148 MDSRLLSGIGAGPDSGSYTDLNRNLQKVGKDRDGEANIRKVAQEFESLFLNEMLKSMRS 60  
ID4365 MDSRLLSGIGAGPDSGSYTDLNRNLQKVGKDRDGEANIRKVAQEFESLFLNEMLKSMRS 60  
IGB83 MDSRLLSGIGAGPDSGSYTDLNRNLQKVGKDRDGEANIRKVAQEFESLFLNEMLKSMRS 60  
\*\*\*\*\*

PA01 ANEALGDGNFMNSQTTKQYQDMYDQQLSVLSKNAGGIGLADVLVRQLSKMKQGSRGNGE 120  
M10 ANEALGDGNFMNSQTTKQYQDMYDQQLSVLSKNAGGIGLADVLVRQLSKMKQGSRGNGE 120  
148 ANEALGDGNFMNSQTTKQYQDMYDQQLSVLSKNAGGIGLADVLVRQLSKMKQGSRGNGE 120  
ID4365 ANEALGDGNFMNSQTTKQYQDMYDQQLSVLSKNAGGIGLADVLVRQLSKMKQGSRGNGE 120  
IGB83 ANEALGDGNFMNSQTTKQYQDMYDQQLSVLSKNAGGIGLADVLVRQLSKMKQGSRGNGE 120  
\*\*\*\*\*

PA01 NPFARVAENGAGRWPSPNSAQAGKALPMPEAGRDDSKLLNQRRLALPGKLAERMLAGIVP 180  
M10 NPFARVAENGAGRWPSPNSAQAGKALPMPEAGRDDSKLLNQRRLALPGKLAERMLAGIVP 180  
148 NPFARVAENGAGRWPSPNSAQAGKALPMPEAGRDDSKLLNQRRLALPGKLAERMLAGIVP 180  
ID4365 NPFARVAENGAGRWPSPNSAQAGKALPMPEAGRDDSKLLNQRRLALPGKLAERMLAGIVP 180  
IGB83 NPFARVAENGAGRWPSPNSAQAGKALPMPEAGRDDSKLLNQRRLALPGKLAERMLAGIVP 180  
\*\*\*\*\*

PA01 SASPAASQMQLGQDSYLPQSYPAASRRGFSTDGVDGSGSRRIAQPPLARGKSMFASAD 240  
M10 SASPAASQMQLGQDSYLPQSYPAASRRGFSTDGVDGSGSRRIAQPPLARGKSMFASAD 240  
148 SASPAASQMQLGQDSYLPQSYPAASRRGFSTDGVDGSGSRRIAQPPLARGKSMFASAD 240  
ID4365 SASPAASQMQLGQDSYLPQSYPTASRRGFSTDGVDGSGSRRIAQPPLARGKSMFASAD 240  
IGB83 SASPAASQMQLGQDSYLPQSYPTASRRGFSTDGVDGSGSRRIAQPPLARGKSMFASAD 240  
\*\*\*\*\*

PA01 EFIATMLPMAQKAAERIGVDARYLVAQAALETGWGKSIIRQQDGGSSHNLFGIKTGSRW 300  
M10 EFIATMLPMAQKAAERIGVDARYLVAQAALETGWGKSIIRQQDGGSSHNLFGIKTGSRW 300  
148 EFIATMLPMAQKAAERIGVDARYLVAQAALETGWGKSIIRQQDGGSSHNLFGIKTGSRW 300  
ID4365 EFIATMLPMAQKAAERIGVDARYLVAQAALETGWGKSIIRQQDGGSSHNLFGIKTGSRW 300  
IGB83 EFIATMLPMAQKAAERIGVDARYLVAQAALETGWGKSIIRQQDGGSSHNLFGIKTGSRW 300  
\*\*\*\*\*

PA01 GASARALTTEYEGGKAVKEIAAFRSYSSFEQSFHDYVSFQLGNDRYQNALDSANPERFM 360  
M10 GASARALTTEYEGGKAVKEIAAFRSYSSFEQSFHDYVSFQLGNDRYQNALDSANPERFM 360  
148 GASARALTTEYEGGKAVKEIAAFRSYSSFEQSFHDYVSFQLGNDRYQNALDSANPERFM 360  
ID4365 GASARALTTEYEGGKAVKEIAAFRSYSSFEQSFHDYVSFQLGNDRYQNALDSANPERFM 360  
IGB83 GASARALTTEYEGGKAVKEIAAFRSYSSFEQSFHDYVSFQLGNDRYQNALDSANPERFM 360  
\*\*\*\*\*

PA01 QELQRAGYATDPQYARKVAQIARQMOTYQAVAAAGTPPLG 400  
M10 QELQRAGYATDPQYARKVAQIARQMOTYQAVAAAGTPPLG 400  
148 QELQRAGYATDPQYARKVAQIARQMOTYQAVAAAGTPPLG 400  
ID4365 QELQRAGYATDPQYARKVAQIARQMOTYQAVAAAGTPPLG 400  
IGB83 QELQRAGYATDPQYARKVAQIARQMOTYQAVAAAGTPPLG 400  
\*\*\*\*\*

**flgK**

PA01 MSDLLSIGLSGLGTSQTWLTVTGHNITNVKTPGYSRQDAIQOTRIPQFSGAGYMGSGSQI 60  
M10 MSDLLSIGLSGLGTSQTWLTVTGHNITNVKTPGYSRQDAIQOTRIPQFSGAGYMGSGSQI 60  
IGB83 MSDLLSIGLSGLGTSQTWLTVTGHNITNVKTPGYSRQDAIQOTRIPQFSGAGYMGSGSQI 60  
ID4365 MSDLLSIGLSGLGTSQTWLTITGHNITNVKTPGYSRQDAIQOTRIPQFSGAGYMGSGSQI 60  
148 MSDLLSIGLSGLGTSQTWLTITGHNITNVKTPGYSRQDAIQOTRIPQFSGAGYMGSGSQI 60  
\*\*\*\*\*

PA01 VDVRRLASDFLTGQLRNATSQNSLNAFLGQIDQLNSLLADNTTGVSPAMQRFFSALQTA 120  
M10 VDVRRLASDFLTGQLRNATSQNSLNAFLGQIDQLNSLLADNTTGVSPAMQRFFSALQTA 120  
IGB83 VDVRRLASDFLTGQLRNATSQNSLNAFLGQIDQLNSLLADNTTGVSPAMQRFFSALQTA 120  
ID4365 VDVRRLASDFLTGQLRNATSQNSLNAFLGQIDQLNSLLADNTTGVSPAMQRFFSALQTA 120



M10 QYKSGITAAKNSLQEEETILNSVGTVIHRIREIAVQAGNGGLDASDKNALATELAQREDE 120  
PA01 QYKSGITAAKNSLQEEETILNSVGTVIHRIREIAVQAGNGGLDASDKNALATELAQREDE 120  
ID4365 QYKSGITAAKNSLQEEETILNSVGTVIHRIREIAVQAGNGGLDASDKNALATELAQREDE 120  
148 QYKTMTEAKNSLQEEETILRSVGNLQRIREIAGQAGDGLDSDNKKSLASELQREDE 120  
\*\*\*:\*:\* \*\*\*\*\*.\*\*\*\*\*.\*\*\*.\*:\*\*\*\*\* \*\*:\*:\*..\*:\*:\*:\* \*\*\*\*\*

IGB83 LLNLLNSRDASGKYLFGSGQDTPFVRNPDGTYSYNGDEGQREVQIASSTFFIAISDNGK 180  
M10 LLNLLNSRDASGKYLFGSGQDTPFVRNPDGTYSYNGDEGQREVQIASSTFFIAISDNGK 180  
PA01 LLNLLNSRDASGKYLFGSGQDTPFVRNPDGTYSYNGDEGQREVQIASSTFFIAISDNGK 180  
ID4365 LLNLLNSRDASGKYLFGSGQDTPFVRNPDGTYSYNGDEGQREVQIASSTFFIAISDNGK 180  
148 LLNLLNSRDASGKYLFGSGQSVQPFVRNEDGTYSYMGDESQREVQIASSTRIPVSDSGK 180  
\*\*\*\*\*.\*\*\*\*\*.\*\*\*\*\* \*\*.\*\*\*\*\*\* \*:\*:\*..\*:\*:\*

IGB83 ILFESGSNANRVSTGKDAAGPDASGNPSSSISLGLVTDKEAYDVFPSSTPPLASDGVG 240  
M10 ILFESGSNANRVSTGKDAAGPDASGNPSSSISLGLVTDKEAYDVFPSSTPPLASDGVG 240  
PA01 ILFESGSNANRVSTGKDAAGPDASGNPSSSISLGLVTDKEAYDVFPSSTPPLASDGVG 240  
ID4365 ILFESGSNANRVSTGKDAAGLDASGNPSSSISLGLVTDKEAYDVFPSSTPPLASDGVG 240  
148 VLFEDIVNAARLDT-KAAAG----NTGDGRISVGLVEDELAFFSOPASNPAAATDGFN 234  
:\*:\*.. \*\* \*:\*:\* \* \*\* \* ..\*.. \*\*:\*:\* \*:\*:\* \*\*:\*:\* \*\*:\*:\*..

IGB83 IHFTDAKNYVYDLKTIIPGYDWSTSDPNPPSFATLASGKIDDNAQTSDFITFGGVKVI 300  
M10 IHFTDAKNYVYDLKTIIPGYDWSTSDPNPPSFATLASGKIDDNAQTSDFITFGGVKVI 300  
PA01 IHFTDAKNYVYDLKTIIPGYDWSTSDPNPPSFATLASGKIDDNAQTSDFITFGGVKVI 300  
ID4365 IHFTDAKNYVYDLKTIIPGYDWSTSDPNPPSFATLASGKIDDNAQTSDFITFGGVKVI 300  
148 IHFVSDKEYVYDPKSLPGYDWTYDPSPPAQWLSKGAIDDDPKTIDKVLVYAGVSVTI 294  
\*\*\*..\*:\*:\* \*\*:\*:\*:\* \*\*.\*..\*:\*..\* \*\*:\*:\*..\*:\*..\* \*\*:\*:\*..\*..\*..\*

IGB83 DGEPOGGDTFSIKRQPDQEKRSLLNTVSDLRKALLSAEDTPAGNLAIRDAVGVAISNLS 360  
M10 DGEPOGGDTFSIKRQPDQEKRSLLNTVSDLRKALLSAEDTPAGNLAIRDAVGVAISNLS 360  
PA01 DGEPOGGDTFSIKRQPDQEKRSLLNTVSDLRKALLSAEDTPAGNLAIRDAVGVAISNLS 360  
ID4365 DGEPOGGDTFSIKRQPDQEKRSLLNTVSDLRKALLSAEDTPAGNLAIRDAVGVAISNLS 360  
148 DGTPKAGDEFVNVYKPGSEKRSLLNVVSDLRKALLESSTDNQAGNDAIRDATAVALTNLSA 354  
\*\* \*..\* \*\* \*:\*:\* :\*..\*\*\*\*\*.\*\*\*\*\* \*:\*..\* \*\* \*..\*..\*..\*..\*..\*..\*

IGB83 SNSQILTGQGRIGARMNVAESTETFDVTLVNTAVISQIQDLDYPEALSRLTLQSTIMD 420  
M10 SNSQILTGQGRIGARMNVAESTETFDVTLVNTAVISQIQDLDYPEALSRLTLQSTIMD 420  
PA01 SNSQILTGQGRIGARMNVAESTETFDVTLVNTAVISQIQDLDYPEALSRLTLQSTIMD 420  
ID4365 SNSQILTGQGRIGARMNVAESTETFDVTLVNTAVISQIQDLDYPEALSRLTLQSTIMD 420  
148 VAAVDGQGGKIGARLNTVESTETFDVTKLVNASVMSQIQDLDYAEALSRLSLQSTIMD 414  
: \*:\*:\*:\*:\*..\*..\*\*\*\*\*.\*\*\*\*\*.\*\*\*\*\*.\*\*\*\*\*.\*\*\*\*\*.\*\*\*\*\*

IGB83 AAQOSFVKIRGLSLFNLYS 439  
M10 AAQOSFVKIRGLSLFNLYS 439  
PA01 AAQOSFVKIRGLSLFNLYS 439  
ID4365 AAQOSFVKIRGLSLFNLYS 439  
148 AAQOSYVKIQGLSLFNLYK 433  
\*\*\*\*\*:\*:\*:\*..\*\*\*\*\*.

**flgM**

IGB83 MVIDFNRLNPGSTPATTGRTGSTAAGRDPATGADKAGQAATSAPKSGESVQISETAQNMQ 60  
M10 MVIDFNRLNPGSTPATTGRTGSTAAGRDPATGADKAGQAATSAPKSGESVQISETAQNMQ 60  
ID4365 MVIDFNRLNPGSTPATTGRTGSTAAGRDPATGADKAGQAATSAPKSGESVQISETAQNMQ 60  
PA01 MVIDFNRLNPGSTPATTGRTGSTAAGRDPATGADKAGQAATSAPKSGESVQISETAQNMQ 60  
148 MVIDFNRLNPGSTPATTGRTGSTAAGRDPATGADKAGQAATSAPKSGESVQISETAQNMQ 60  
\*\*\*\*\*.\*\*\*\*\*.\*\*\*\*\*.\*\*\*\*\*.\*\*\*\*\*.\*\*\*\*\*.\*\*\*\*\*.\*\*\*\*\*.\*\*\*\*\*.\*\*\*\*\*

IGB83 KVTDLQQLTPVVDNDKVARIKQAIADGTQVDSERVASKLLDFESQR 107  
M10 KVTDLQQLTPVVDNDKVARIKQAIADGTQVDSERVASKLLDFESQR 107  
ID4365 KVTDLQQLTPVVDNDKVARIKQAIADGTQVDSERVASKLLDFESQR 107  
PA01 KVTDLQQLTPVVDNDKVARIKQAIADGTQVDSERVASKLLDFESQR 107  
148 KVTDLQQLTPVVDNDKVARIKQAIADGTQVDSERVASKLLDFESQR 107  
\*\*\*\*\*.\*\*\*\*\*.\*\*\*\*\*.\*\*\*\*\*.\*\*\*\*\*.\*\*\*\*\*.\*\*\*\*\*.\*\*\*\*\*.\*\*\*\*\*.\*\*\*\*\*

**flgQ**

PA01 MWRETKLLLIDNLDNRDLAVILNFLGEDQLTCNSDWREVAAGLSNSREALCVLLGSV 60  
148 MWRETKLLLIDNLDNRDLAVILNFLGEDQLTCNSDWREVAAGLSNSREALCVLLGSV 60  
IGB83 MWRETKLLLIDNLDNRDLAVILNFLGEDQLTCNSDWREVAAGLSNSREALCVLLGSV 60  
M10 MWRETKLLLIDNLDNRDLAVILNFLGEDQLTCNSDWREVAAGLSNSREALCVLLGSV 60  
ID4365 MWRETKLLLIDNLDNRDLAVILNFLGEDQLTCNSDWREVAAGLSNSREALCVLLGSV 60  
\*\*\*\*\*.\*\*\*\*\*.\*\*\*\*\*.\*\*\*\*\*.\*\*\*\*\*.\*\*\*\*\*.\*\*\*\*\*.\*\*\*\*\*.\*\*\*\*\*.\*\*\*\*\*

PA01 ESKGGAVELLKQLASWDEYLPILLIGEPAPADWPEELRRRVLASLEMPSPYNKLLDSLHR 120  
148 ESKGGAVELLKQLASWDEYLPILLIGEPAPADWPEELRRRVLASLEMPSPYNKLLDSLHR 120  
IGB83 ESKGGAVELLKQLASWDEYLPILLIGEPAPADWPEELRRRVLASLEMPSPYNKLLDSLHR 120  
M10 ESKGGAVELLKQLASWDEYLPILLIGEPAPADWPEELRRRVLASLEMPSPYNKLLDSLHR 120  
ID4365 ESKGGAVELLKQLASWDEYLPILLIGEPAPADWPEELRRRVLASLEMPSPYNKLLDSLHR 120  
\*\*\*\*\*.\*\*\*\*\*.\*\*\*\*\*.\*\*\*\*\*.\*\*\*\*\*.\*\*\*\*\*.\*\*\*\*\*.\*\*\*\*\*.\*\*\*\*\*.\*\*\*\*\*

PA01 AQVYREMYDQARERGRSREPDLFRSLVGTSSRAIQVVRQMMQVADTDASVILGESGTGK 180  
148 AQVYREMYDQARERGRSREPDLFRSLVGTSSRAIQVVRQMMQVADTDASVILGESGTGK 180  
IGB83 AQVYREMYDQARERGRSREPDLFRSLVGTSSRAIQVVRQMMQVADTDASVILGESGTGK 180

M10 AQVYREMYDQARERGRSREP NLF RSLVGT SRAIQV RQMMQVADTDASV LILGESGTGK 180  
ID4365 AQVYREMYDQARERGRSREP NLF RSLVGT SRAIQV RQMMQVADTDASV LILGESGTGK 180  
\*\*\*\*\*

PA01 EVVARNLHYHSKRREGPFV P VNCGAI PAELLESELFGHEKGAF TGAITSRAGR FELANGG 240  
148 EVVARNLHYHSKRREGPFV P VNCGAI PAELLESELFGHEKGAF TGAITSRAGR FELANGG 240  
IGB83 EVVARNLHYHSKRREGPFV P VNCGAI PAELLESELFGHEKGAF TGAITSRAGR FELANGG 240  
M10 EVVARNLHYHSKRREGPFV P VNCGAI PAELLESELFGHEKGAF TGAITSRAGR FELANGG 240  
ID4365 EVVARNLHYHSKRREGPFV P VNCGAI PAELLESELFGHEKGAF TGAITSRAGR FELANGG 240  
\*\*\*\*\*

PA01 TLFLDEIGDMPLPMQVKLLRVLQERTFERVGSNK TQNV D VRI IAATHKNLEKMI EDGTFR 300  
148 TLFLDEIGDMPLPMQVKLLRVLQERTFERVGSNK TQNV D VRI IAATHKNLEKMI EDGTFC 300  
IGB83 TLFLDEIGDMPLPMQVKLLRVLQERTFERVGSNK TQNV D VRI IAATHKNLEKMI EDGTFR 300  
M10 TLFLDEIGDMPLPMQVKLLRVLQERTFERVGSNK TQNV D VRI IAATHKNLEKMI EDGTFR 300  
ID4365 TLFLDEIGDMPLPMQVKLLRVLQERTFERVGSNK TQNV D VRI IAATHKNLEKMI EDGTFR 300  
\*\*\*\*\*

PA01 EDLYYRLNVFP IEMAPLRERVED IALLLNELI SRMEHEKRGSI RFNSAAIMSLCRHDWPG 360  
148 EDLYYRLNVFP IEMAPLRERVED IALLLNELI SRMEHEKRGSI RFNSAAIMSLCRHDWPG 360  
IGB83 EDLYYRLNVFP IEMAPLRERVED IALLLNELI SRMEHEKRGSI RFNSAAIMSLCRHDWPG 360  
M10 EDLYYRLNVFP IEMAPLRERVED IALLLNELI SRMEHEKRGSI RFNSAAIMSLCRHDWPG 360  
ID4365 EDLYYRLNVFP IEMAPLRERVED IALLLNELI SRMEHEKRGSI RFNSAAIMSLCRHDWPG 360  
\*\*\*\*\*

PA01 NVRELANLVERLAIMHPYGVIGV GELPKKFRHV DDEDEQLASSLREELEERAAINAGLPG 420  
148 NVRELANLVERLAIMHPYGVIGV GELPKKFRHV DDEDEQLASSLREELEERAAINAGLPG 420  
IGB83 NVRELANLVERLAIMHPYGVIGV GELPKKFRHV DDEDEQLASSLREELEERAAINAGLPG 420  
M10 NVRELANLVERLAIMHPYGVIGV GELPKKFRHV DDEDEQLASSLREELEERAAINAGLPG 420  
ID4365 NVRELANLVERLAIMHPYGVIGV GELPKKFRHV DDEDEQLASSLREELEERAAINAGLPG 420  
\*\*\*\*\*

PA01 MDAPAMLP AEGLDLKD YLANLEQGLIQ QALDDAGGVV ARAAERLIRRTTLVEKMRKYGM 480  
148 MDAPAMLP AEGLDLKD YLANLEQGLIQ QALDDAGGVV ARAAERLIRRTTLVEKMRKYGM 480  
IGB83 MDAPAMLP AEGLDLKD YLANLEQGLIQ QALDDAGGVV ARAAERLIRRTTLVEKMRKYGM 480  
M10 MDAPAMLP AEGLDLKD YLANLEQGLIQ QALDDAGGVV ARAAERLIRRTTLVEKMRKYGM 480  
ID4365 MDAPAMLP AEGLDLKD YLANLEQGLIQ QALDDAGGVV ARAAERLIRRTTLVEKMRKYGM 480  
\*\*\*\*\*

PA01 SRRDDLSDD 490  
148 SRRDDLSDD 490  
IGB83 SRRDDLSDD 490  
M10 SRRDDLSDD 490  
ID4365 SRRDDLSDD 490  
\*\*\*\*\*

**fileR**

PA01 MAAKVLVVEDDRALREALSD TLLGGHEFVA VDSAEALPVLAREAFSLV ISDVNMPGMD 60  
148 MAAKVLVVEDDRALREALSD TLLGGHEFVA VDSAEALPVLAREAFSLV ISDVNMPGMD 60  
IGB83 MAAKVLVVEDDRALREALSD TLLGGHEFVA VDSAEALPVLAREAFSLV ISDVNMPGMD 60  
M10 MAAKVLVVEDDRALREALSD TLLGGHEFVA VDSAEALPVLAREAFSLV ISDVNMPGMD 60  
ID4365 MAAKVLVVEDDRALREALSD TLLGGHEFVA VDSAEALPVLAREAFSLV ISDVNMPGMD 60  
\*\*\*\*\*

PA01 GHQLLGLIRTRYPHLPVLLMTAYGAVDR AVEAMRQGAADYLVKPF EARALLDLVARHALG 120  
148 GHQLLGLIRTRYPHLPVLLMTAYGAVDR AVEAMRQGAADYLVKPF EARALLDLVARHALG 120  
IGB83 GHQLLGLIRTRYPHLPVLLMTAYGAVDR AVEAMRQGAADYLVKPF EARALLDLVARHALG 120  
M10 GHQLLGLIRTRYPHLPVLLMTAYGAVDR AVEAMRQGAADYLVKPF EARALLDLVARHALG 120  
ID4365 GHQLLGLIRTRYPHLPVLLMTAYGAVDR AVEAMRQGAADYLVKPF EARALLDLVARHALG 120  
\*\*\*\*\*

PA01 QLPGSEEDGPVALEPASRQ LLELAARVARSDSTV LISGESGTGKEVLANY IHQQSPRAGK 180  
148 QLPGSEEDGPVALEPASRQ LLELAARVARSDSTV LISGESGTGKEVLANY IHQQSPRAGK 180  
IGB83 QLPGSEEDGPVALEPASRQ LLELAARVARSDSTV LISGESGTGKEVLANY IHQQSPRAGK 180  
M10 QLPGSEEDGPVALEPASRQ LLELAARVARSDSTV LISGESGTGKEVLANY IHQQSPRAGK 180  
ID4365 QLPGSEEDGPVALEPASRQ LLELAARVARSDSTV LISGESGTGKEVLANY IHQQSPRAGK 180  
\*\*\*\*\*

PA01 PFIAINCAAIPDNMLEATLFGHEKGSFTG AIAAQPGKFELADGGTILLDEISEMPLGLQA 240  
148 PFIAINCAAIPDNMLEATLFGHEKGSFTG AIAAQPGKFELADGGTILLDEISEMPLGLQA 240  
IGB83 PFIAINCAAIPDNMLEATLFGHEKGSFTG AIAAQPGKFELADGGTILLDEISEMPLGLQA 240  
M10 PFIAINCAAIPDNMLEATLFGHEKGSFTG AIAAQPGKFELADGGTILLDEISEMPLGLQA 240  
ID4365 PFIAINCAAIPDNMLEATLFGHEKGSFTG AIAAQPGKFELADGGTILLDEISEMPLGLQA 240  
\*\*\*\*\*

PA01 KLLRVLQEREVERVGARKPINLDIRVLA TTNRD LAAEVAAGR FREDLYRLSVFP LAW RP 300  
148 KLLRVLQEREVERVGARKPINLDIRVLA TTNRD LAAEVAAGR FREDLYRLSVFP LAW RP 300  
IGB83 KLLRVLQEREVERVGARKPINLDIRVLA TTNRD LAAEVAAGR FREDLYRLSVFP LAW RP 300  
M10 KLLRVLQEREVERVGARKPINLDIRVLA TTNRD LAAEVAAGR FREDLYRLSVFP LAW RP 300  
ID4365 KLLRVLQEREVERVGARKPINLDIRVLA TTNRD LAAEVAAGR FREDLYRLSVFP LAW RP 300  
\*\*\*\*\*

PA01 LRERPADILPLAERLLRKHRSKMNLGAVALGPEAAQCLVRHAWPGNVRELDNAIQRALIL 360  
148 LRERPADILPLAERLLRKHRSKMNLGAVALGPEAAQCLVRHAWPGNVRELDNAIQRALIL 360  
IGB83 LRERPADILPLAERLLRKHRSKMNLGAVALGPEAAQCLVRHAWPGNVRELDNAIQRALIL 360  
M10 LRERPADILPLAERLLRKHRSKMNLGAVALGPEAAQCLVRHAWPGNVRELDNAIQRALIL 360  
ID4365 LRERPADILPLAERLLRKHRSKMNLGAVALGPEAAQCLVRHAWPGNVRELDNAIQRALIL 360  
\*\*\*\*\*  
PA01 QQGGLIQPADLCLTAPIGMPLAAPVVPMPAMPPTPPSVEIPSPAAGQDASGALGDDL 420  
148 QQGGLIQPADLCLTAPIGMPLA--VVPMPAMPPTPPSVEIPSPAAGQDASGALGDDL 418  
IGB83 QQGGLIQPADLCLTAPIGMPLAAPVVPMPAMPPTPPSVEIPSPAAGQDASGALGDDL 420  
M10 QQGGLIQPADLCLTAPIGMPLAAPVVPMPAMPPTPPSVEIPSPAAGQDASGALGDDL 420  
ID4365 QQGGLIQPADLCLTAPIGMPLAAPVVPMPAMPPTPPSVEIPSPAAGQDATGALGDDL 420  
\*\*\*\*\*;\*\*\*\*\*  
PA01 RREFQVIIDTLRTERGRRKEAERLGISPRTLRYKLAQMRDAGMDVEAYLYAI 473  
148 RREFQVIIDTLRTERGRRKEAERLGISPRTLRYKLAQMRDAGMDVEAYLYAI 471  
IGB83 RREFQVIIDTLRTERGRRKEAERLGISPRTLRYKLAQMRDAGMDVEAYLYAI 473  
M10 RREFQVIIDTLRTERGRRKEAERLGISPRTLRYKLAQMRDAGMDVEAYLYAI 473  
ID4365 RREFQVIIDTLRTERGRRKEAERLGISPRTLRYKLAQMRDAGMDVEAYLYAI 473  
\*\*\*\*\*

**fileS**

PA01 MQPALNAFTEQPADTAEATSRAGLEQAFALFNQMSSQLSESYSLEERVTELKQLALVS 60  
148 MQPALNAFTEQPADTAEATSRAGLEQAFALFNQMSSQLSESYSLEERVTELKQLALVS 60  
M10 MQPALNAFTEQPADTAEATSRAGLEQAFALFNQMSSQLSESYSLEERVTELKQLALVS 60  
ID4365 MQPALNAFTEQPADTAEATSRAGLEQAFALFNQMSSQLSESYSLEERVTELKQLALVS 60  
IGB83 MQPALNAFTEQPADTAEATSRAGLEQAFALFNQMSSQLSESYSLEERVTELKQLALVS 60  
\*\*\*\*\*.  
PA01 AQRMEELAEKERLANRLQSLDLLPGGVIVI DAHGVVREANPAALGGLGEPVGLWREV 120  
148 AQRMEELAEKERLANRLQSLDLLPGGVIVI DAHGVVREANPAALGGLGEPVGLWREV 120  
M10 AQRMEELAEKERLANRLQSLDLLPGGVIVI DAHGVVREANPAALGGLGEPVGLWREV 120  
ID4365 AQRMEELAEKERLANRLQSLDLLPGGVIVI DAHGVVREANPAALGGLGEPVGLWREV 120  
IGB83 AQRMEELAEKERLANRLQSLDLLPGGVIVI DAHGVVREANPAALGGLGEPVGLWREV 120  
\*\*\*\*\*  
PA01 IARCFAPREDDGHEISLRDGRRLSIATRSLNGEPGQLILLNDLTDTRRLOEQLARHERLS 180  
148 IARCFAPREDDGHEISLRDGRRLSIATRSLNGEPGQLILLNDLTDTRRLOEQLARHERLS 180  
M10 IARCFAPREDDGHEISLRDGRRLSIATRSLNGEPGQLILLNDLTDTRRLOEQLARHERLS 180  
ID4365 IARCFAPREDDGHEISLRDGRRLSIATRSLNGEPGQLILLNDLTDTRRLOEQLARHERLS 180  
IGB83 IARCFAPREDDGHEISLRDGRRLSIATRSLNGEPGQLILLNDLTDTRRLOEQLARHERLS 180  
\*\*\*\*\*  
PA01 ALGRMVASLAHQIRTPLSAALLYAGHLEQALPTDQQRFAGRLKERLHELEHQVRDMLV 240  
148 ALGRMVASLAHQIRTPLSAALLYAGHLEQALPTDQQRFAGRLKERLHELEHQVRDMLV 240  
M10 ALGRMVASLAHQIRTPLSAALLYAGHLEQALPTDQQRFAGRLKERLHELEHQVRDMLV 240  
ID4365 ALGRMVASLAHQIRTPLSAALLYAGHLEQALPTDQQRFAGRLKERLHELEHQVRDMLV 240  
IGB83 ALGRMVASLAHQIRTPLSAALLYAGHLEQALPTDQQRFAGRLKERLHELEHQVRDMLV 240  
\*\*\*\*\*  
PA01 FARGELPLTDRVAPKALFDSLRAAAEVHVQGLQVRWQCEARGGELLCNRDTLVGTVLNLV 300  
148 FARGELPLTDRVAPKALFDSLRAAAEVHVQGLQVRWQCEARGGELLCNRDTLVGTVLNLV 300  
M10 FARGELPLTDRVAPKALFDSLRAAAEVHVQGLQVRWQCEARGGELLCNRDTLVGTVLNLV 300  
ID4365 FARGELPLTDRVAPKALFDSLRAAAEVHVQGLQVRWQCEARGGELLCNRDTLVGTVLNLV 300  
IGB83 FARGELPLTDRVAPKALFDSLRAAAEVHVQGLQVRWQCEARGGELLCNRDTLVGTVLNLV 300  
\*\*\*\*\*  
PA01 ENAIQACGPELRLKVHLYARADSLRLSVSDNGPGMDPATLARLGEFFFTTKTTGTGLGLA 360  
148 ENAIQACGPELRLKVHLYARADSLRLSVSDNGPGMDPATLARLGEFFFTTKTTGTGLGLA 360  
M10 ENAIQACGPELRLKVHLYARADSLRLSVSDNGPGMDPATLARLGEFFFTTKTTGTGLGLA 360  
ID4365 ENAIQACGPELRLKVHLYARADSLRLSVSDNGPGMDPATLARLGEFFFTTKTTGTGLGLA 360  
IGB83 ENAIQACGPELRLKVHLYARADSLRLSVSDNGPGMDPATLARLGEFFFTTKTTGTGLGLA 360  
\*\*\*\*\*  
PA01 VVKAVARAHQGLQLRSRPGRGTCATLILPLIPAAPLSAIE 402  
148 VVKAVARAHQGLQLRSRPGRGTCATLILPLIPAAPLSAIE 402  
M10 VVKAVARAHQGLQLRSRPGRGTCATLILPLIPAAPLSAIE 402  
ID4365 VVKAVARAHQGLQLRSRPGRGTCATLILPLIPAAPLSAIE 402  
IGB83 VVKAVARAHQGLQLRSRPGRGTCATLILPLIPAAPLSAIE 402  
\*\*\*\*\*

**fileN**

PA01 MKQMGSMHPVQVIAVTGGKGGVGTNNVSNLALALADLGRVMLLDADLGLANVDVLLGL 60  
148 MKQMGSMHPVQVIAVTGGKGGVGTNNVSNLALALADLGRVMLLDADLGLANVDVLLGL 60  
ID4365 ---MGSMHPVQVIAVTGGKGGVGTNNVSNLALALADLGRVMLLDADLGLANVDVLLGL 57  
M10 MKQMGSMHPVQVIAVTGGKGGVGTNNVSNLALALADLGRVMLLDADLGLANVDVLLGL 60  
IGB83 MKQMGSMHPVQVIAVTGGKGGVGTNNVSNLALALADLGRVMLLDADLGLANVDVLLGL 60  
\*\*\*\*\*  
PA01 TPKRTLADVIEGRCELRDVLLGPGGVRIVPAASGTQSMVHLSPMQHAGLIQAFSDISDN 120  
148 TPKRTLADVIEGRCELRDVLLGPGGVRIVPAASGTQSMVHLSPMQHAGLIQAFSDISDN 120

ID4365 TPKRTLADVIEGRCELRDVLLLGPGGVRIVPAASGTQSMVHLSPMQHAGLIQAFSDISDN 117  
M10 TPKRTLADVIEGRCELRDVLLLGPGGVRIVPAASGTQSMVHLSPMQHAGLIQAFSDISDN 120  
IGB83 TPKRTLADVIEGRCELRDVLLLGPGGVRIVPAASGTQSMVHLSPMQHAGLIQAFSDISDN 120  
\*\*\*\*\*

PAO1 LDVLLVDDTAAGIGDSVSVFVRAAQEVLLVVCDEPTSIDAYALIKLLNRDHGMTRFRVLA 180  
148 LDVLLVDDTAAGIGDSVSVFVRAAQEVLLVVCDEPTSIDAYALIKLLNRDHGMTRFRVLA 180  
ID4365 LDVLLVDDTAAGIGDSVSVFVRAAQEVLLVVCDEPTSIDAYALIKLLNRDHGMTRFRVLA 177  
M10 LDVLLVDDTAAGIGDSVSVFVRAAQEVLLVVCDEPTSIDAYALIKLLNRDHGMTRFRVLA 180  
IGB83 LDVLLVDDTAAGIGDSVSVFVRAAQEVLLVVCDEPTSIDAYALIKLLNRDHGMTRFRVLA 180  
\*\*\*\*\*

PAO1 NMAHSPQEGRNLFAKLTKVTDRLDVALQYVGVIPYDESVRKAVQKQRAVYEAFFPRSKAS 240  
148 NMAHSPQEGRNLFAKLTKVTDRLDVALQYVGVIPYDESVRKAVQKQRAVYEAFFPRSKAS 240  
ID4365 NMAHSPQEGRNLFAKLTKVTDRLDVALQYVGVIPYDESVRKAVQKQRAVYEAFFPRSKAS 237  
M10 NMAHSPQEGRNLFAKLTKVTDRLDVALQYVGVIPYDESVRKAVQKQRAVYEAFFPRSKAS 240  
IGB83 NMAHSPQEGRNLFAKLTKVTDRLDVALQYVGVIPYDESVRKAVQKQRAVYEAFFPRSKAS 240  
\*\*\*\*\*

PAO1 LAFKAVAQKVDSWPLPANPRGHLEFFVERLVQHPATGSAV 280  
148 LAFKAVAQKVDSWPLPANPRGHLEFFVERLVQHPATGSAV 280  
ID4365 LAFKAVAQKVDSWPLPANPRGHLEFFVERLVQHPATGSAV 277  
M10 LAFKAVAQKVDSWPLPANPRGHLEFFVERLVQHPATGSAV 280  
IGB83 LAFKAVAQKVDSWPLPANPRGHLEFFVERLVQHPATGSAV 280  
\*\*\*\*\*

**motA**

IGB83 MSKIIGIIVVFASVLGGFLLSGGKIGAI IQPFEVLIIGGAALGAFLOSNPGSTFMVVLKK 60  
M10 MSKIIGIIVVFASVLGGFLLSGGKIGAI IQPFEVLIIGGAALGAFLOSNPGSTFMVVLKK 60  
PAO1 MSKIIGIIVVFASVLGGFLLSGGKIGAI IQPFEVLIIGGAALGAFLOSNPGSTFMVVLKK 60  
148 MSKIIGIIVVFASVLGGFLLSGGKIGAI IQPFEVLIIGGAALGAFLOSNPGSTFMVVLKK 60  
ID4365 MSKIIGIIVVFASVLGGFLLSGGKIGAI IQPFEVLIIGGAALGAFLOSNPGSTFMVVLKK 60  
\*\*\*\*\*

IGB83 APKMFSNRFTQTYYLEVLGMLYEILNKSRRREGMMAIEADIEDPAASPIFSKYPGVLKDER 120  
M10 APKMFSNRFTQTYYLEVLGMLYEILNKSRRREGMMAIEADIEDPAASPIFSKYPGVLKDER 120  
PAO1 APKMFSNRFTQTYYLEVLGMLYEILNKSRRREGMMAIEADIEDPAASPIFSKYPGVLKDER 120  
148 APKMFSNRFTQTYYLEVLGMLYEILNKSRRREGMMAIEADIEDPAASPIFSKYPGVLKDER 120  
ID4365 APKMFSNRFTQTYYLEVLGMLYEILNKSRRREGMMAIEADIEDPAASPIFSKYPGVLKDER 120  
\*\*\*\*\*

IGB83 MTAYVCDYLIRIMSSGNMAPHELEGLFDMELSSLKEDLEHPSHAVTKVADALPGFGIVA AV 180  
M10 MTAYVCDYLIRIMSSGNMAPHELEGLFDMELSSLKEDLEHPSHAVTKVADALPGFGIVA AV 180  
PAO1 MTAYVCDYLIRIMSSGNMAPHELEGLFDMELSSLKEDLEHPSHAVTKVADALPGFGIVA AV 180  
148 MTAYVCDYLIRIMSSGNMAPHELEGLFDMELSSLKEDLEHPSHAVTKVADALPGFGIVA AV 180  
ID4365 MTAYVCDYLIRIMSSGNMAPHELEGLFDMELSSLKEDLEHPSHAVTKVADALPGFGIVA AV 180  
\*\*\*\*\*

IGB83 LGIVITMALLGEGSQAEIGHHVAAALVGTFLGILAAAYGFVGPLAGALEHDAKEELNLF EA 240  
M10 LGIVITMALLGEGSQAEIGHHVAAALVGTFLGILAAAYGFVGPLAGALEHDAKEELNLF EA 240  
PAO1 LGIVITMALLGEGSQAEIGHHVAAALVGTFLGILAAAYGFVGPLAGALEHDAKEELNLF EA 240  
148 LGIVITMALLGEGSQAEIGHHVAAALVGTFLGILAAAYGFVGPLAVALEHDAKEELNMF EA 240  
ID4365 LGIVITMALLGEGSQAEIGHHVAAALVGTFLGILAAAYGFVGPLAVALEHDAKEELNMF EA 240  
\*\*\*\*\*

IGB83 IKACLVASASGMPPSLAVEFGRKVLLPAHRPTFAELEQAVRGR 283  
M10 IKACLVASASGMPPSLAVEFGRKVLLPAHRPTFAELEQAVRGR 283  
PAO1 IKACLVASASGMPPSLAVEFGRKVLLPAHRPTFAELEQAVRGR 283  
148 IKACLVASASGMPPSLAVEFGRKVLLPAHRPTFAELEQAVRGR 283  
ID4365 IKACLVASASGMPPSLAVEFGRKVLLPAHRPTFAELEQAVRGR 283  
\*\*\*\*\*

**motB**

PAO1 MDNNQPIIVKRVKRYAAGHHGGSWKIAFADFATAMMAFFLVWLSSATPEQKKAISGYF 60  
148 MDNNQPIIVKRVKRYAAGHHGGSWKIAFADFATAMMAFFLVWLSSATPEQKKAISGYF 60  
IGB83 MDNNQPIIVKRVKRYAAGHHGGSWKIAFADFATAMMAFFLVWLSSATPEQKKAISGYF 60  
M10 MDNNQPIIVKRVKRYAAGHHGGSWKIAFADFATAMMAFFLVWLSSATPEQKKAISGYF 60  
ID4365 MDNNQPIIVKRVKRYAAGHHGGSWKIAFADFATAMMAFFLVWLSSATPEQKKAISGYF 60  
\*\*\*\*\*

PAO1 QDPIGFSESASPYVIDLGGTPTPAPDKTLNPQVQAQPDNSNESRISPEQDHQVNADQAENL 120  
148 QDPIGFSESASPYVIDLGGTPTPAPDKTLNPQVQAQPDNSNESRISPEQDHQVNADQAENL 120  
IGB83 QDPIGFSESASPYVIDLGGTPTPAPDKTLNPQVQAQPDNSNESRISPEQDHQVNADQAENL 120  
M10 QDPIGFSESASPYVIDLGGTPTPAPDKTLNPQVQAQPDNSNESRISPEQDHQVNADQAENL 120  
ID4365 QDPIGFSESASPYVIDLGGTPTPAPDKTLNPQVQAQPDNSNESRISPEQDHQVNADQAENL 120  
\*\*\*\*\*

PAO1 AEQVERERLALLLQELQNKVDENPMLKDFKQIHFEITRDGLRIQIVDAANRPMFDLGS A 180  
148 AEQVERERLALLLQELQNKVDENPMLKDFKQIHFEITRDGLRIQIVDAANRPMFDLGS A 180  
IGB83 AEQVERERLALLLQELQNKVDENPMLKDFKQIHFEITRDGLRIQIVDAANRPMFDLGS A 180  
M10 AEQVERERLALLLQELQNKVDENPMLKDFKQIHFEITRDGLRIQIVDAANRPMFDLGS A 180



ID4365 AEQVERERLALLQELQNKVDENPMLKDFKDIHFEITRDGLRIQIVDAANRPMFDLGS 180  
\*\*\*\*\*

PA01 RLQPYFEDILLAMAETIRQVPNKISISGHTDAKPYAGNGDFGNWELSANRANAARRALVA 240  
148 RLQPYFEDILLAMAETIRQVPNKISISGHTDAKPYAGNGDFGNWELSANRANAARRALVA 240  
IGB83 RLQPYFEDILLAMAETIRQVPNKISISGHTDAKPYAGNGDFGNWELSANRANAARRALVA 240  
M10 RLQPYFEDILLAMAETIRQVPNKISISGHTDAKPYAGNGDFGNWELSANRANAARRALVA 240  
ID4365 RLQPYFEDILLAMAETIRQVPNKISISGHTDAKPYAGNGDFGNWELSANRANAARRALVA 240  
\*\*\*\*\*

PA01 GGYPEGQIAQVVGYSARLFDKDPNPNVRRIDIVVLTRKAQKAI EGETGAPEASAPAA 300  
148 GGYPEGQIAQVVGYSARLFDKDPNPNVRRIDIVVLTRKAQKAI EGETGAPEASAPAA 300  
IGB83 GGYPEGQIAQVVGYSARLFDKDPNPNVRRIDIVVLTRKAQKAI EGETGAPEASAPAA 300  
M10 GGYPEGQIAQVVGYSARLFDKDPNPNVRRIDIVVLTRKAQKAI EGETGAPEASAPAA 300  
ID4365 GGYPEGQIAQVVGYSARLFDKDPNPNVRRIDIVVLTRKAQKAI EGETGAPEASAPAA 300  
\*\*\*\*\*

PA01 APGEPKPAEAPAAGAQPSPADEVQKKNLFDGGSCLKLEQIKGD 347  
148 APGEPKPAEAPAAGAQPSPADEVQKKNLFDGGSCLKLEQIKGD 347  
IGB83 APGEPKPAEAPAAGAQPSPADEVQKKNLFDGGSCLKLEQIKGD 347  
M10 APGEPKPAEAPAAGAQPSPADEVQKKNLFDGGSCLKLEQIKGD 347  
ID4365 APGEPKPAEAPAAGAQPSPADEVQKKNLFDGGSCLKLEQIKGD 347  
\*\*\*\*\*

**motC**

IGB83 MDVLSLVGIIILAFVAIVGGNFLEGGHAGALLNGPAALIVIGGTLAAALLQTPVNVLKRGL 60  
M10 MDVLSLVGIIILAFVAIVGGNFLEGGHAGALLNGPAALIVIGGTLAAALLQTPVNVLKRGL 60  
ID4365 MDVLSLVGIIILAFVAIVGGNFLEGGHAGALLNGPAALIVIGGTLAAALLQTPVNVLKRGL 60  
PA01 MDVLSLVGIIILAFVAIVGGNFLEGGHAGALLNGPAALIVIGGTLAAALLQTPVNVLKRGL 60  
148 -----MPCSTAALIVIGGTLAAALLQTPVNVLKRGL 32  
\*\*\*\*\*

IGB83 GMLGWVFFPPREDLSSGIDRIVSWSMTARKEGLLGLESIAEAEPDPYARKGLQLLVDGAE 120  
M10 GMLGWVFFPPREDLSSGIDRIVSWSMTARKEGLLGLESIAEAEPDPYARKGLQLLVDGAE 120  
ID4365 GMLGWVFFPPREDLSSGIDRIVSWSMTARKEGLLGLESIAEAEPDPYARKGLQLLVDGAE 120  
PA01 GMLGWVFFPPREDLSSGIDRIVSWSMTARKEGLLGLESIAEAEPDPYARKGLQLLVDGAE 120  
148 GMLGWVFFPPREDLSSGIDRIVSWSMTARKEGLLGLESIAEAEPDPYARKGLQLLVDGAE 92  
\*\*\*\*\*

IGB83 PEVIRSILEVDLFTQESRDLQAAKVFESMGGYAPTIGIIGAVMGLIHVMGNLANPAQLGS 180  
M10 PEVIRSILEVDLFTQESRDLQAAKVFESMGGYAPTIGIIGAVMGLIHVMGNLANPAQLGS 180  
ID4365 PEVIRSILEVDLFTQESRDLQAAKVFESMGGYAPTIGIIGAVMGLIHVMGNLANPAQLGS 180  
PA01 PEVIRSILEVDLFTQESRDLQAAKVFESMGGYAPTIGIIGAVMGLIHVMGNLANPAQLGS 180  
148 PEVIRSILEVDLFTQESRDLQAAKVFESMGGYAPTIGIIGAVMGLIHVMGNLANPAQLGS 152  
\*\*\*\*\*

IGB83 GIAVAFVATIYGVGAFANLLLPIGNKLTVLVLRQSRREMLLEGLLSIAEGENPRSELK 240  
M10 GIAVAFVATIYGVGAFANLLLPIGNKLTVLVLRQSRREMLLEGLLSIAEGENPRSELK 240  
ID4365 GIAVAFVATIYGVGAFANLLLPIGNKLTVLVLRQSRREMLLEGLLSIAEGENPRSELK 240  
PA01 GIAVAFVATIYGVGAFANLLLPIGNKLTVLVLRQSRREMLLEGLLSIAEGENPRSELK 240  
148 GIAVAFVATIYGVGAFANLLLPIGNKLTVLVLRQSRREMLLEGLLSIAEGENPRSELK 212  
\*\*\*\*\*

IGB83 LQGFMD 246  
M10 LQGFMD 246  
ID4365 LQGFMD 246  
PA01 LQGFMD 246  
148 LQGFMD 218  
\*\*\*\*\*

**motD**

IGB83 MQRRRRHQEEHENHERWLVSADFITLLFAFFVVMYSSINEGKYKILSETLTGVFNQP 60  
M10 MQRRRRHQEEHENHERWLVSADFITLLFAFFVVMYSSINEGKYKILSETLTGVFNQP 60  
ID4365 MQRRRRHQEEHENHERWLVSADFITLLFAFFVVMYSSINEGKYKILSETLTGVFNQP 60  
PA01 MQRRRRHQEEHENHERWLVSADFITLLFAFFVVMYSSINEGKYKILSETLTGVFNQP 60  
148 MQRRRRHQEEHENHERWLVSADFITLLFAFFVVMYSSINEGKYKILSETLTGVFNQP 60  
\*\*\*\*\*

IGB83 DRSLKPIPIGDERPRTTEPERTSVVEEQPSDNAASADSLERIASVRDAFGDLIASDQLSV 120  
M10 DRSLKPIPIGDERPRTTEPERTSVVEEQPSDNAASADSLERIASVRDAFGDLIASDQLSV 120  
ID4365 DRSLKPIPIGDERPRTTEPERTSVVEEQPSDNAASADSLERIASVRDAFGDLIASDQLSV 120  
PA01 DRSLKPIPIGDERPRTTEPERTSVVEEQPSDNAASADSLERIASVRDAFGDLIASDQLSV 120  
148 DRSLKPIPIGDERPRTTEPERTSVVEEQPSDNAASADSLERIASVRDAFGDLIASDQLSV 120  
\*\*\*\*\*

IGB83 RGNELWIEITLNSLLFPDGDALPNDAAFDIVEKVAKILAPYKNPIHVEGFTDDVPIHSP 180  
M10 RGNELWIEITLNSLLFPDGDALPNDAAFDIVEKVAKILAPYKNPIHVEGFTDDVPIHSP 180  
ID4365 RGNELWIEITLNSLLFPDGDALPNDAAFDIVEKVAKILAPYKNPIHVEGFTDDVPIHSP 180  
PA01 RGNELWIEITLNSLLFPDGDALPNDAAFDIVEKVAKILAPYKNPIHVEGFTDDVPIHSP 180  
148 RGNELWIEITLNSLLFPDGDALPNDAAFDIVEKVAKILAPYKNPIHVEGFTDDVPIHSP 180  
\*\*\*\*\*

IGB83 RYPTNWELSAARAASIVRLLGNDGVEPSRMAAVGYGEFQPVDNASEGRAKNRRVVLVI 240  
M10 RYPTNWELSAARAASIVRLLGNDGVEPSRMAAVGYGEFQPVDNASEGRAKNRRVVLVI 240  
ID4365 RYPTNWELSAARAASIVRLLGNDGVEPSRMAAVGYGEFQPVDNASEGRAKNRRVVLVI 240  
PA01 RYPTNWELSAARAASIVRLLGNDGVEPSRMAAVGYGEFQPVDNASEGRAKNRRVVLVI 240  
148 RYPTNWELSAARAASIVRLLGNDGVEPSRMAAVGYGEFQPVDNASEGRAKNRRVVLVI 240  
\*\*\*\*\*

IGB83 SRNLEVRSSVSGVSGKAQPSALRHAGSAAQTQAADTGGTPAPAPATVNSPSPSP 296  
M10 SRNLEVRSSVSGVSGKAQPSALRHAGSAAQTQAADTGGTPAPAPATVNSPSPSP 296  
ID4365 SRNLEVRSSVSGVSGKAQPSALRHAGSAAQTQAADTGGTPAPAPATVNSPSPSP 296  
PA01 SRNLEVRSSVSGVSGKAQPSALRHAGSAAQTQAADTGGTPAPAPATVNSPSPSP 296  
148 SRNLEVRSSVSGVSGKAQPSALRHAGSAAQTQAADTGGTPAPAPATVNSPSPSP 296  
\*\*\*\*\*

**motY**

148 MQPRLLLL PFLSSLPALAVTFQTRLESVEWKVEGDQFECRLSQPVANFGVGEFVRRAGE 60  
ID4365 MQPRLLLL PFLSSLPALAVTFQTRLESVEWKVEGDQFECRLSQPVANFGVGEFVRRAGE 60  
PA01 MQPRLLLL PFLSSLPALAVTFQTRLESVEWKVEGDQFECRLSQPVANFGVGEFVRRAGE 60  
IGB83 MQPRLLLL PFLSSLPALAVTFQTRLESVEWKVEGDQFECRLSQPVANFGVGEFVRRAGE 60  
M10 MQPRLLLL PFLSSLPALAVTFQTRLESVEWKVEGDQFECRLSQPVANFGVGEFVRRAGE 60  
\*\*\*\*\*

148 QATFRLKPEAQWLGRGSATLLAAAPPWRPGQDINLGQVSI GSGEVPFNSSQQQAGRLLT 120  
ID4365 QATFRLKPEAQWLGRGSATLLAAAPPWRPGQDINLGQVSI GSGEVPFNSSQQQAGRLLT 120  
PA01 QATFRLKPEAQWLGRGSATLLAAAPPWRPGQDINLGQVSI GSGEVPFNSSQQQAGRLLT 120  
IGB83 QATFRLKPEAQWLGRGSATLLAAAPPWRPGQDINLGQVSI GSGEVPFNSSQQQAGRLLT 120  
M10 QATFRLKPEAQWLGRGSATLLAAAPPWRPGQDINLGQVSI GSGEVPFNSSQQQAGRLLT 120  
\*\*\*\*\*

148 GLLEGRSPLVRHRTWQDRLEVRLPARFASVYSQYQACIAKLLPVNFDQVKLAQVGFDP 180  
ID4365 GLLEGRSPLVRHRTWQDRLEVRLPARFASVYSQYQACIAKLLPVNFDQVKLAQVGFDP 180  
PA01 GLLEGRSPLVRHRTWQDRLEVRLPARFASVYSQYQACIAKLLPVNFDQVKLAQVGFDP 180  
IGB83 GLLEGRSPLVRHRTWQDRLEVRLPARFASVYSQYQACIAKLLPVNFDQVKLAQVGFDP 180  
M10 GLLEGRSPLVRHRTWQDRLEVRLPARFASVYSQYQACIAKLLPVNFDQVKLAQVGFDP 180  
\*\*\*\*\*

148 GGTALNDVARAKLDIILQLLKADPSINRIELDGHSDNSGNRLTNRDLSRRRALAVQEYLK 240  
ID4365 GGTALNDVARAKLDIILQLLKADPSINRIELDGHSDNSGNRLTNRDLSRRRALAVQEYLK 240  
PA01 GGTALNDVARAKLDIILQLLKADPSINRIELDGHSDNSGNRLTNRDLSRRRALAVQEYLK 240  
IGB83 GGTALNDVARAKLDIILQLLKADPSINRIELDGHSDNSGNRLTNRDLSRRRALAVQEYLK 240  
M10 GGTALNDVARAKLDIILQLLKADPSINRIELDGHSDNSGNRLTNRDLSRRRALAVQEYLK 240  
\*\*\*\*\*

148 SNGVPESQINRVFYGERYPLVANNSAANRARNRRVTVHLSREAVVEPATEAPKAEDKPAP 300  
ID4365 SNGVPESQINRVFYGERYPLVANNSAANRARNRRVTVHLSREAVVEPATEAPKAEDKPAP 300  
PA01 SNGVPESQINRVFYGERYPLVANNSAANRARNRRVTVHLSREAVVEPATEAPKAEDKPAP 300  
IGB83 SNGVPESQINRVFYGERYPLVANNSAANRARNRRVTVHLSREAVVEPATEAPKAEDKPAP 300  
M10 SNGVPESQINRVFYGERYPLVANNSAANRARNRRVTVHLSREAVVEPATEAPKAEDKPAP 300  
\*\*\*\*\*

148 PAAEPAAPKPP-AASLQKPTV----- 321  
ID4365 PAAEPAAPKPP-AASLQKPTV----- 321  
PA01 PAAEPAAPKPP-AASLQKPTV----- 321  
IGB83 PAAEPAAPKPP-AASLQKPTV----- 321  
M10 PAAEPAAPRSLRPPRFRENPRFESRKR 327  
\*\*\*\*\*: . . . : \* .

**fliH**

PA01 MYPHDKDKDNPSSELIRGKDVAAFGLWSLPSFDEPRDEPAVAAPQVPAVAEPAPAPAVEE 60  
148 MYPHDKDKDNPSSELIRGKDVAAFGLWSLPSFDEPRDEPAVAAPQVPAVAEPAPAPAVEE 60  
IGB83 MYPHDKDKDNPSSELIRGKDVAAFGLWSLPSFDEPRDEPAVAAPQVPAVAEPAPAPAVEE 60  
M10 MYPHDKDKDNPSSELIRGKDVAAFGLWSLPSFDEPRDEPAVAAPQVPAVAEPAPAPAVEE 60  
ID4365 MYPHDKDKDNPSSELIRGKDVAAFGLWSLPSFDEPRDEPAVAAPQVPAVAEPAPAPAVEE 60  
\*\*\*\*\*

PA01 VELETVKPPTLEEIEAIRQDAYNEGFATGERDGFHAGQLKARQEAEEALKERLQSLERLM 120  
148 VELETVKPPTLEEIEAIRQDAYNEGFATGERDGFHAGQLKARQEAEEALKERLQSLERLM 120  
IGB83 VELETVKPPTLEEIEAIRQDAYNEGFATGERDGFHAGQLKARQEAEEALKERLQSLERLM 120  
M10 VELETVKPPTLEEIEAIRQDAYNEGFATGERDGFHAGQLKARQEAEEALKERLQSLERLM 120  
ID4365 VELETVKPPTLEEIEAIRQDAYNEGFATGERDGFHAGQLKARQEAEEALKERLQSLERLM 120  
\*\*\*\*\*

PA01 TQLEPIAEQDALIEQGMVNLVNHVARQVIQRELHMDSSHVRQVLRREALKLLPMGAANIR 180  
148 TQLEPIAEQDALIEQGMVNLVNHVARQVIQRELHMDSSHVRQVLRREALKLLPMGAANIR 180  
IGB83 TQLEPIAEQDALIEQGMVNLVNHVARQVIQRELHMDSSHVRQVLRREALKLLPMGAANIR 180  
M10 TQLEPIAEQDALIEQGMVNLVNHVARQVIQRELHMDSSHVRQVLRREALKLLPMGAANIR 180  
ID4365 TQLEPIAEQDALTIEQGMVNLVNHVARQVIQRELHMDSSHVRQVLRREALKLLPMGAANIR 180  
\*\*\*\*\*

PA01 IHVNPQDFERVKALRERHEESWRILEDDSLPGGCRITETHSRIDATIETRLAQAVKQLF 240

148 IHVNPQDFERVKALRERHEESWRILEDDSLPGGCRIETESRIDATIETRLAQAVKQLF 240  
IGB83 IHVNPQDFERVKALRERHEESWRILEDDSLPGGCRIETESRIDATIETRLAQAVKQLF 240  
M10 IHVNPQDFERVKALRERHEESWRILEDDSLPGGCRIETESRIDATIETRLAQAVKQLF 240  
ID4365 IHVNPQDFERVKALRERHEESWRILEDDSLPGGCRIETESRIDATIETRLAQAVKQLF 240  
\*\*\*\*\*

PA01 EQQREQATHPLASDIRIDLDAPGDVDAP 268  
148 EQQREQATHPLASDIRIDLDAPGDVDAP 268  
IGB83 EQQREQATHPLASDIRIDLDAPGDVDAP 268  
M10 EQQREQATHPLASDIRIDLDAPGDVDAP 268  
ID4365 EQQREQATHPLASDIRIDLDAPGDVDAP 268  
\*\*\*\*\*

**flis**

IGB83 MYAMKAMKQYQQVSI EAQVSDANPHRLIQLLMQGGLERLAQARGAMEREQIPEKGILIGK 60  
M10 MYAMKAMKQYQQVSI EAQVSDANPHRLIQLLMQGGLERLAQARGAMEREQIPEKGILIGK 60  
PA01 MYAMKAMKQYQQVSI EAQVSDANPHRLIQLLMQGGLERLAQARGAMEREQIPEKGILIGK 60  
ID4365 MYAMKAMKQYQQVSI EAQVSDANPHRLIQLLMQGGLERLAQARGAMEREQIPEKGILIGK 60  
148 ---MAAMRQYQNVSTQAQIDASPHRLIQMLMEGGLTRMAQARGALERGEVALKGEIGK 57  
\* \*\*:\*\*\*:\*\* :\*\* . \*\* .\*\*\*\*\*:\*\*:\*\*\* \*:\*\*\*\*\*:\*\* :;. \*\* \*\*\*\*

IGB83 AIGIIGGLREALDSEGGELAGNLDRLYEYMIARLVEANTSNDTSLLEVSALLEVKSG 120  
M10 AIGIIGGLREALDSEGGELAGNLDRLYEYMIARLVEANTSNDTSLLEVSALLEVKSG 120  
PA01 AIGIIGGLREALDSEGGELAGNLDRLYEYMIARLVEANTSNDTSLLEVSALLEVKSG 120  
ID4365 AIGIIGGLREALDSEGGELAGNLDRLYEYMIARLVEANTSNDTSLLEVSALLEVKSG 120  
148 AIAIVGGLREGLDFEAGGELAANLDRLYAYMSMRLTEANLKNAGKLEEVSELLRNKSG 117  
\*\*.:\*\*\*\*\*.\*\* \* \*\*\*\*\*.\*\*\*\*\* \*\* \*\*.\*\*\* .\*\*:. \*:\* \*\* \*\* ::\*\*

IGB83 WDGISH 126  
M10 WDGISH 126  
PA01 WDGISH 126  
ID4365 WDGISH 126  
148 WDAIAP 123  
\*\*.\*:
